# Supplementary material for: 18F-Fluoroform: a 18F-trifluoromethylating agent for the synthesis of SCF218F-aromatic derivatives
Source: Royal Society of Chemistry journal article supplement (doi:10.1039/c7cc02652h), 2017-01-01

# **$^{18}\text{F}$ -Fluoroform: a $^{18}\text{F}$ -trifluoromethylating agent for the synthesis of $\text{SCF}_2^{18}\text{F}$ -aromatic derivatives**

*Elodie Carbonnel,<sup>a</sup> Tatiana Besset,<sup>a</sup> Thomas Poisson,<sup>a</sup> Daniel Labar,<sup>b</sup> Xavier Pannecoucke<sup>a</sup> and Philippe Jubault.<sup>a</sup>*

a : Normandie Univ, INSA Rouen, UNIROUEN, CNRS, COBRA (UMR 6014),  
76000 Rouen, France.

b : Pole of Molecular Imaging, Radiotherapy and Oncology (MIRO), Institute of Experimental and  
Clinical Research (IREC), Université Catholique de Louvain, Av. Hippocrate, 54, 1200-Brussels  
Belgium.

## **Supporting information**

## Table of contents

|                                                                                            |     |
|--------------------------------------------------------------------------------------------|-----|
| Section A: Non radioactive chemistry .....                                                 | S3  |
| <b>1. General information</b> .....                                                        | S3  |
| <b>2. Materials</b> .....                                                                  | S3  |
| <b>3. Synthesis of reagent 1·CH<sub>2</sub>Cl<sub>2</sub></b> .....                        | S3  |
| <b>4. Procedures for the synthesis of disulfides</b> .....                                 | S5  |
| Procedure A for the synthesis of disulfanes <b>2b</b> , <b>2d</b> and <b>2g</b> .....      | S5  |
| Procedure B for the synthesis of the 1,2-bis(4-fluorophenyl) disulfane <b>2c</b> .....     | S6  |
| Procedure C for the synthesis of the dimethyl 4,4'-disulfanediyldibenzoate <b>2h</b> ..... | S6  |
| Procedure D for the synthesis of the 4,4'-disulfanediyldibenzonitrile <b>2i</b> .....      | S6  |
| <b>5. Procedure for the synthesis of 2-(phenylthio)isoindoline-1,3-dione 4a</b> .....      | S7  |
| <b>6. Purification and characterization of substrates</b> .....                            | S7  |
| <b>7. References</b> .....                                                                 | S9  |
| <b>8. Copies of <sup>1</sup>H, <sup>13</sup>C and <sup>19</sup>F NMR spectra</b> .....     | S10 |
| Section B: Radioactive chemistry .....                                                     | S22 |
| <b>1. General information</b> .....                                                        | S22 |
| <b>2. Material</b> .....                                                                   | S22 |
| <b>3. Home-made remote controlled module</b> .....                                         | S22 |
| <b>4. Typical procedure for the [<sup>18</sup>F]-trifluoromethylation reaction.</b> .....  | S25 |
| <b>5. Determination of the specific activity</b> .....                                     | S26 |
| <b>6. HPLC chromatograms of SCF<sub>2</sub><sup>18</sup>F-containing products</b> .....    | S29 |

## Section A: Non radioactive chemistry

### 1. General information

All reactions were carried out using oven dried glassware and magnetic stirring under an atmosphere of argon unless otherwise stated. Flash chromatography was performed with silica gel (0.040-0.063 mm). Analytical thin layer chromatography was performed on silica gel aluminum plates with F-254 indicator and visualized by UV light (254 nm) and/or chemical staining with a  $\text{KMnO}_4$  solution or a phosphomolybdic acid solution.  $^1\text{H}$  NMR spectra were recorded on a Bruker DXP 300 at 300.1 MHz,  $^{13}\text{C}$  NMR spectra at 75.5 MHz and  $^{19}\text{F}$  NMR spectra at 282.4 MHz. Chemical shifts ( $\delta$ ) are quoted in parts per million (ppm) relative to the residual solvent peak for  $\text{CDCl}_3$  ( $\delta\text{H} = 7.26$  ppm;  $\delta\text{C} = 77.0$  ppm or relative to external  $\text{CFCl}_3$ :  $\delta = 0$  ppm),  $\text{CH}_3\text{CN}$  ( $\delta\text{H} = 1.94$  ppm;  $\delta\text{C} = 118.26$  ppm, 1.32 ppm or relative to external  $\text{CFCl}_3$ :  $\delta = 0$  ppm). The following abbreviations have been used:  $\delta$  (chemical shift),  $J$  (coupling constant), br (broad), s (singlet), d (doublet), t (triplet), m (multiplet), dd (doublet of doublet), dt (doublet of triplet), qq (quadruplet of quadruplet). High-resolution mass spectra (HRMS) were recorded on Waters LCT Premier. IR spectra were recorded on a PerkinElmer Spectrum 100, the wave numbers ( $\nu$ ) of recorded IR-signals (ATR) are quoted in  $\text{cm}^{-1}$ . Melting points were recorded on a Heizbank system Kofler WME and were uncorrected.

### 2. Materials

$\text{CH}_2\text{Cl}_2$  and thiophenol were distilled over  $\text{CaH}_2$  prior to use. Mesitylene and THF were distilled over  $\text{Na/benzophenone}$  prior to use.  $\text{CH}_3\text{CN}$ , DMF and MeOH (sealed bottle over molecular sieves) and sodium chlorodifluoroacetate (96%) were purchased from Acros Organics. *m*CPBA (71%), *t*BuOK ( $\geq 98\%$ ) and trifluoromethanesulfonyl anhydride (99%) were purchased from Aldrich.  $\text{HCF}_3$  (98%) from Apollo Scientific. 4-Bromothiophenol, 4-chlorothiophenol, 4-cyanobenzenesulfonyl chloride, 4-fluorothiophenol, 4-mercaptobenzoic acid, 2-mercaptopyridine, 2-naphthalenethiol, 4-*tert*-butylthiophenol, thiophenol, 1,2-di(pyridin-2-yl)disulfane, 1,2-bis(4-chlorophenyl)disulfane, 1,2-bis(4-methoxyphenyl)disulfane, 1,2-diphenyldisulfane, *S*-phenyl benzenesulfonothioate were purchased from Acros Organics, Aldrich, Alfa Aesar, Maybridge and TCI.

### 3. Synthesis of reagent $1 \cdot \text{CH}_2\text{Cl}_2$

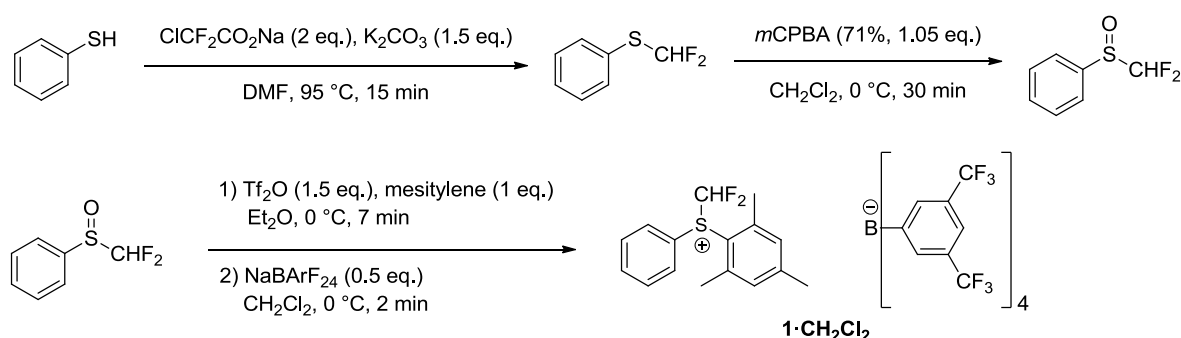

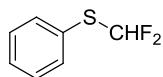

**Difluoromethylphenyl sulfide.** Synthesized following the slightly modified procedure reported by Akita and co-workers.<sup>[1]</sup> Sodium chlorodifluoroacetate (13.72 g, 90 mmol, 2 eq.) and K<sub>2</sub>CO<sub>3</sub> (9.34 g, 67.5 mmol, 1.5 eq.) were added in a 500 mL two necked flask and dried under high vacuum for 1 h. DMF (99%, 150 mL) was added at RT, followed by the addition of the thiophenol dropwise (4.59 mL, 45 mmol, 1 eq.). The reaction mixture was stirred at 95 °C for 15 min (exothermic reaction) and then cooled to RT. Water (130 mL) and pentane (130 mL) were added. The layers were separated and the organic layer was washed with water (4 x 130 mL), dried over MgSO<sub>4</sub> and concentrated under vacuum to furnish a colorless oil (6.3 g, 88%) which was directly used without further purification. **R<sub>f</sub>** (pentane): 0.56. **<sup>1</sup>H NMR** (CDCl<sub>3</sub>, 300.1 MHz): δ 7.52-7.44 (m, 2H), 7.36-7.24 (m, 3H), 6.72 (t, *J* = 57.0, 1H). **<sup>13</sup>C NMR** (CDCl<sub>3</sub>, 75.5 MHz): δ 135.3, 129.7, 129.3, 126.1 (t, *J* = 3.0 Hz), 121.0 (t, *J* = 275.6 Hz). **<sup>19</sup>F NMR** (CDCl<sub>3</sub>, 282.4 MHz) δ -91.3 (d, *J* = 56.8 Hz, 2F). **IR** (cm<sup>-1</sup>) v: 3062, 2926, 1579, 1476, 1440, 1297, 1321, 1065, 1024, 797, 736, 688. **HRMS** (EI) calcd for C<sub>7</sub>H<sub>6</sub>F<sub>2</sub>S *m/z* 160.01583 [M]<sup>+</sup>, found 160.01444 (8.69 ppm). The data were consistent with literature.<sup>[1]</sup>

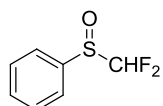

**Difluoromethylphenylsulfoxide.** Synthesized following the slightly modified procedure reported by Olah and co-workers.<sup>[2]</sup> *m*CPBA (71%, 1.79 g, 7.36mmol, 1.05 eq.) was added at 0 °C to a stirred solution of difluoromethylphenyl sulfide (1.04 g, 7mmol, 1eq.) in CH<sub>2</sub>Cl<sub>2</sub> (18mL). The resulting mixture was stirred at 0 °C for 30 minutes and then filtered. An aqueous 1 mol.L<sup>-1</sup> NaOH solution (5 mL) was added until a pH of 14 was reached and then CH<sub>2</sub>Cl<sub>2</sub> (20 mL) was added. The aqueous layer was extracted with CH<sub>2</sub>Cl<sub>2</sub> (3 x 20 mL). The combined organic layers were dried over MgSO<sub>4</sub> and concentrated under vacuum. The crude reaction mixture was purified by flash chromatography on silica gel (petroleum ether/diethyl ether = 70:30, height 15 cm, width 4 cm) to yield a colorless oil (0.88 g, 72%). **R<sub>f</sub>** (petroleum ether/diethyl ether = 70:30): 0.30. **<sup>1</sup>H NMR** (CDCl<sub>3</sub>, 300.1 MHz) δ 7.75-7.69 (m, 2H), 7.65-7.55 (m, 3H), 6.04 (t, *J* = 55.5 Hz, 1H). **<sup>13</sup>C NMR** (CDCl<sub>3</sub>, 75.5 MHz) δ 136.7 (t, *J* = 3.2 Hz), 133.0, 129.7, 125.6, 121.0 (t, *J* = 289.2 Hz). **<sup>19</sup>F NMR** (CDCl<sub>3</sub>, 282.4 MHz) δ -119.3 (dd, *J* = 283.8, 55.4 Hz, 1F), -120.3 (dd, *J* = 283.8, 55.4 Hz, 1F). **IR** (cm<sup>-1</sup>): 3063, 2976, 1479, 1446, 1280, 1088, 1047, 1023, 743, 686. **HRMS** (EI) calcd for C<sub>7</sub>H<sub>6</sub>F<sub>2</sub>OS *m/z* 176.01074 [M]<sup>+</sup>, found 176.01096 (1.25 ppm). The data were consistent with literature.<sup>[2]</sup>

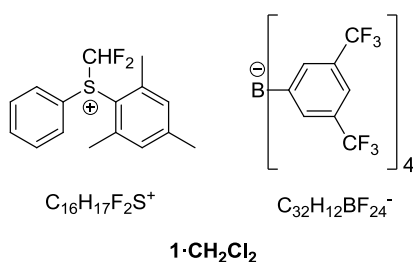

#### S-Difluoromethyl-S-mesityl-S-

#### phenylsulfonium*tetra*(3,5di(trifluoromethyl)phenyl)borate·CH<sub>2</sub>Cl<sub>2</sub> (**1·CH<sub>2</sub>Cl<sub>2</sub>**)

Synthesized following our previously described procedure.<sup>[3]</sup> Technical grade solvents were used to perform the reaction. Triflic anhydride (0.34 mL, 2.40 mmol, 1.5 eq.) was added dropwise at 0 °C to a stirred solution of difluoromethylphenylsulfoxide (0.28 g, 1.60 mmol, 1 eq.) and mesitylene (0.27 mL, 1.60 mmol, 1 eq.) in Et<sub>2</sub>O (16 mL). After stirring for 7 min, the solvent was removed using a syringe. The residual red oil was washed with cold Et<sub>2</sub>O (10 mL) at 0°C and the solvent was removed again. Solid NaBArF<sub>24</sub> (0.8 mmol, 0.71 g, 0.5 eq.) was added followed by CH<sub>2</sub>Cl<sub>2</sub> (8mL). After stirring for 2 min at 0 °C, the mixture was diluted with cold toluene (20 mL) and filtered over cotton (the filtered was not washed). The filtrate was diluted with petroleum ether (400 mL) to obtain a cloudy solution. CH<sub>2</sub>Cl<sub>2</sub> (50 mL) was added and the mixture was kept for 1 day at room temperature under air. The salt was filtered off to give the pure compound **1·CH<sub>2</sub>Cl<sub>2</sub>** as colorless crystals (0.45 g, 46%). <sup>1</sup>H NMR (CD<sub>3</sub>CN, 300.1MHz) δ 7.98 (t, *J* = 52.5 Hz, 1H), 7.84-7.58 (m, 17H), 7.34 (s, 2H), 5.42 (CH<sub>2</sub>Cl<sub>2</sub>), 2.45 (s, 6H), 2.38 (s, 3H). <sup>13</sup>C NMR (CD<sub>3</sub>CN, 75.5 MHz) δ 162.8 (q, *J* = 49.8 Hz + septet, *J* = 16.6 Hz), 150.2, 146.6, 135.8, 135.3, 134.1, 132.7, 130.1 (qq, *J* = 31.0, 2.3 Hz), 129.5, 125.6 (q, *J* = 271.8 Hz), 120.6 (dt, *J* = 298.2, 3.8 Hz), 118.3, 111.3, 22.1 (br s), 21.6 (br d, *J* = 3.0 Hz). <sup>19</sup>F NMR (CD<sub>3</sub>CN, 282.4 MHz) δ -63.2 (s, 24F), -94.2 (dd, *J* = 225.6, 52.5 Hz, 1F), -95.3 (dd, *J* = 225.6, 52.5 Hz, 1F). HRMS (ESI<sup>+</sup>) calcd for C<sub>16</sub>H<sub>17</sub>F<sub>2</sub>S *m/z* 279.1019 [M<sup>+</sup>], found 279.1021. HRMS (ESI<sup>-</sup>) calcd for C<sub>32</sub>H<sub>12</sub>F<sub>24</sub>B *m/z* 863.0649 [M<sup>-</sup>], found 863.0662. The data were consistent with literature.<sup>[3]</sup>

## 4. Procedures for the synthesis of disulfides

Procedure A for the synthesis of disulfides **2b**, **2d** and **2g**<sup>[4]</sup>

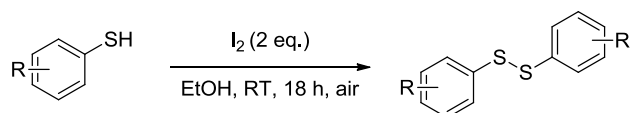

I<sub>2</sub> (2 eq.) was added to a stirred solution of the thiophenol derivative (1 eq.) in ethanol (C = 1 mol.L<sup>-1</sup>). The reaction mixture was stirred for 18 h under an air atmosphere at RT. The product was obtained by filtration over a sintered-glass filter. If required, the product was purified by flash chromatography on silica gel.

Procedure B for the synthesis of the 1,2-bis(4-fluorophenyl) disulfane **2c**<sup>[4]</sup>

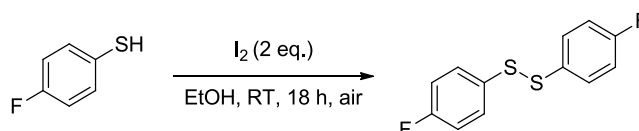

$I_2$  (4 g, 15.8 mmol, 2 eq.) was added to a stirred solution of the 4-fluorothiophenol (0.86 mL, 7.9 mmol, 1 eq.) in ethanol (8 mL). The reaction mixture was stirred for 18 h under an air atmosphere at RT. The reaction mixture was quenched by addition of water (10 mL) and by addition of solid  $Na_2S_2O_3$  until complete disappearance of the brown color. Then, ethanol was removed under vacuum and EtOAc was added (20 mL). The layers were separated and the aqueous layer was extracted with EtOAc (3 x 25 mL). The combined organic layers were dried over  $MgSO_4$  and concentrated under vacuum. The crude product was purified by flash chromatography on silica gel to yield the desired product **2c**.

Procedure C for the synthesis of the dimethyl 4,4'-disulfanediyl dibenzoate **2h**<sup>[4]</sup>

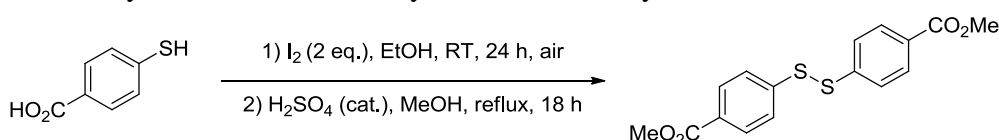

$I_2$  (9.9 g, 39 mmol, 2 eq.) was added to a stirred solution of the 4-mercaptobenzoic acid (3 g, 19.5 mmol, 1 eq) in ethanol (24 mL). The reaction mixture was stirred for 24 h under an air atmosphere at RT. 4,4'-disulfanediyl dibenzoic acid was obtained by filtration over a sintered-glass filter and was directly engaged without further purification. Then 4,4'-disulfanediyl dibenzoic acid (2.5 g, 8.16 mmol, 1 eq) was then dissolved in MeOH (30 mL) and conc.  $H_2SO_4$  (4 mL) was added. The resulting mixture was refluxed (65 °C) for 18 h and filtered off over a sintered-glass filter. The crude solid was purified by flash chromatography on silica gel to yield the desired product **2h**.

Procedure D for the synthesis of the 4,4'-disulfanediyl dibenzonitrile **2i**<sup>[4],[5]</sup>

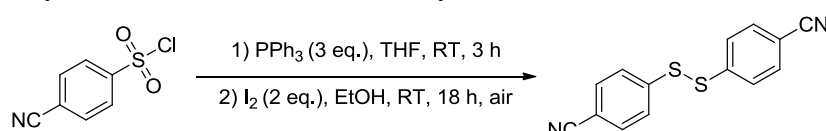

$PPh_3$  (9.8 g, 37.2 mmol, 3 eq.) was added to a solution of 4-cyanobenzenesulfonyl chloride (2.5 g, 12.4 mmol, 1 eq.) in THF (50 mL). The resulting mixture was stirred for 3 h at RT and then concentrated under vacuum. The residue was dissolved in EtOAc (50 mL) and petroleum ether (300 mL) was slowly added. The white precipitate ( $Ph_3PO$ ) was filtered off and the filtrate was concentrated under vacuum to give a mixture of the 4,4'-disulfanediyl dibenzonitrile and the corresponding thiol. The reaction mixture was dissolved in ethanol (13 mL) and  $I_2$  (6.1 g, 24 mmol, 2 eq.) was added. The reaction mixture was stirred for 18 h under an air atmosphere at RT. The desired product **2i** was obtained by filtration over a sintered-glass and used without further purification.

## 5. Procedure for the synthesis of 2-(phenylthio)isoindoline-1,3-dione **4a**<sup>[6]</sup>

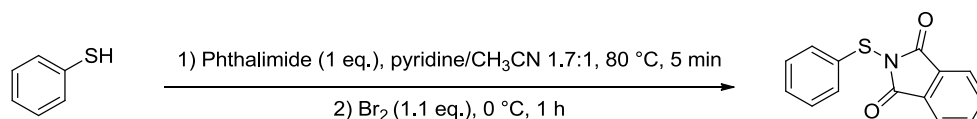

A mixture of phthalimide (0.8 g, 5.87 mmol, 1 eq.) and thiophenol (0.63 mL, 6.16 mmol, 1.05 eq.) in CH<sub>3</sub>CN (2.6 mL) and pyridine (4.5 mL) was stirred for 5 min at 80 °C and then cooled down to 0 °C. A solution of Br<sub>2</sub> (0.33 mL, 6.46 mmol, 1.1 eq.) in CH<sub>3</sub>CN (2.9 mL) was added dropwise for 10 min at 0 °C and the resulting mixture was further stirred at 0 °C for 1h. Then, water (12mL) was added dropwise at 0 °C and the resulting heterogeneous solution was filtered off. The crude product was recrystallized in MeOH (10 mL) to give the desired compound **4a**.

## 6. Purification and characterization of substrates

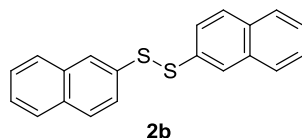

**1,2-Di(naphthalen-2-yl)disulfane 2b.** The product was synthesized according to the procedure A from 2-naphtalenethiol (0.99 g, 6.20 mmol). **2b** was obtained by filtration of the reaction mixture followed by purification by flash chromatography on silica gel (width 3 cm, height 15 cm, petroleum ether) to yield a yellow solid (0.98 g, 99%). **R<sub>f</sub>** (petroleum ether): 0.42. **mp**: 145-146 °C. **<sup>1</sup>H NMR** (CDCl<sub>3</sub>, 300.1 MHz): δ 8.02-7.98 (m, 2H), 7.83-7.71 (m, 6H), 7.64 (dd, *J* = 8.7, 1.8 Hz, 2H), 7.51-7.42 (m, 4H). **<sup>13</sup>C NMR** (CDCl<sub>3</sub>, 75.5 MHz): δ 134.2, 133.4, 132.5, 129.0, 127.7, 127.4, 126.7, 126.5, 126.2, 125.6. **IR** (cm<sup>-1</sup>) *v*: 3052, 1581, 1498, 1337, 1268, 1132, 864, 813, 738, 478. **HRMS** (EI) calcd for C<sub>20</sub>H<sub>14</sub>S<sub>2</sub> *m/z* 318.05369 [*M*]<sup>+</sup>, found 318.05434 (2.05 ppm). The data were consistent with literature.<sup>[7]</sup>

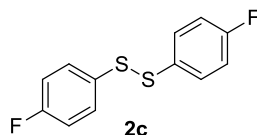

**1,2-Bis(4-fluorophenyl) disulfane 2c.** The product was synthesized according to the procedure B from 4-fluorothiophenol (0.84 mL, 7.90mmol). **2c** was purified by flash chromatography on silica gel (width 6 cm, height 17 cm, petroleum ether) to yield a yellow oil (1 g, 99%). **R<sub>f</sub>** (petroleum ether/diethyl ether 80:20): 0.45. **<sup>1</sup>H NMR** (CDCl<sub>3</sub>, 300.1 MHz): δ 7.54-7.36 (m, 4H), 7.00 (dd, *J* = 8.4, 8.4 Hz, 4H). **<sup>13</sup>C NMR** (CDCl<sub>3</sub>, 75.5 MHz): δ 162.5 (d, *J* = 248.4 Hz), 132.1 (d, *J* = 3.8 Hz), 131.2 (d, *J* = 8.3 Hz), 116.2 (d, *J* = 22.7 Hz). **<sup>19</sup>F NMR** (CDCl<sub>3</sub>, 282.4 MHz): δ -114.0 to -113.9 (m, 2F). **IR** (cm<sup>-1</sup>) *v*: 3066, 1587, 1485, 1396, 1223, 1154, 1077, 1012, 820, 620, 499. **HRMS** (EI) calcd for C<sub>12</sub>H<sub>8</sub>F<sub>2</sub>S<sub>2</sub> *m/z* 254.00355 [*M*]<sup>+</sup>, found 254.00446 (3.58 ppm). The data were consistent with literature.<sup>[7]</sup>

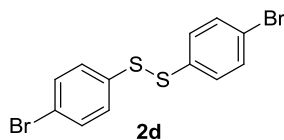

**1,2-Bis(4-bromophenyl)disulfane 2d.** The product was synthesized according to the procedure A from 4-bromothiophenol (1.32 g, 7.0 mmol). **2d** was obtained by filtration of the reaction mixture to yield a yellow solid (1.24 g, 95%). **R<sub>f</sub>** (petroleum ether): 0.69. **mp**: 99-100 °C. **<sup>1</sup>H NMR** (CDCl<sub>3</sub>, 300.1 MHz): δ 7.46-7.39(m, 4H), 7.37-7.30 (m, 4H). **<sup>13</sup>C NMR** (CDCl<sub>3</sub>, 75.5 MHz): δ 135.7, 132.2, 129.3, 121.5. **IR** (cm<sup>-1</sup>) v: 3069, 1466, 1383, 1079, 1066, 1005, 811, 495, 475. **HRMS** (EI) calcd for C<sub>12</sub>H<sub>8</sub>Br<sub>2</sub>S<sub>2</sub> *m/z* 373.84342 [M]<sup>+</sup>, found 373.84445 (2.76 ppm). The data were consistent with literature.<sup>[7]</sup>

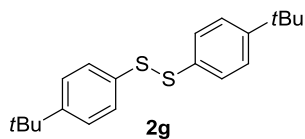

**1,2-Bis(4-(tert-butyl)phenyl)disulfane 2g.** The product was synthesized according to the procedure A from 4-*tert*-butylthiophenol (2.07 mL, 12mmol, 1 eq.). **2g** was obtained by filtration of the reaction mixture to yield a yellow solid (1.20 g, 61%). **R<sub>f</sub>** (petroleum ether): 0.61. **mp**: 95-96 °C. **<sup>1</sup>H NMR** (CDCl<sub>3</sub>, 300.1 MHz): δ 7.52-7.44 (m, 4H), 7.40-7.33 (m, 4H), 1.33 (s, 18H). **<sup>13</sup>C NMR** (CDCl<sub>3</sub>, 75.5 MHz): δ 150.4, 134.0, 127.7, 126.1, 34.5, 31.2. **IR** (cm<sup>-1</sup>) v: 2956, 2927, 2861, 1484, 1395, 1361, 1265, 1113, 1009, 822, 547. **HRMS** (EI) calcd for C<sub>20</sub>H<sub>26</sub>S<sub>2</sub> *m/z* 330.14759 [M]<sup>+</sup>, found 330.14679 (-2.42 ppm). The data were consistent with literature.<sup>[7]</sup>

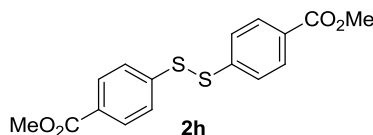

**Dimethyl 4,4'-disulfanediyldibenzoate 2h.** The product was obtained according to the procedure C from 4-mercaptobenzoic acid (3 g, 19.5 mmol, 1 eq). **2h** was isolated by purification by flash chromatography (width 4 cm, height 14 cm, petroleum ether/diethyl ether 60:40) as a white solid (1.3 g, 40%). **R<sub>f</sub>** (petroleum ether/diethyl ether 60:40): 0.53. **mp**: 130-131 °C. **<sup>1</sup>H NMR** (CDCl<sub>3</sub>, 300.1 MHz): δ 7.96 (d, *J* = 8.7 Hz, 4H), 7.52 (d, *J* = 8.7, 4H), 3.89 (s, 6H). **<sup>13</sup>C NMR** (CDCl<sub>3</sub>, 75.5 MHz): δ 166.3, 142.1, 130.2, 128.8, 125.9, 52.2. **IR** (cm<sup>-1</sup>) v: 2949, 1713, 1589, 1434, 1274, 1108, 752, 686. **HRMS** (ESI) calcd for C<sub>16</sub>H<sub>18</sub>NO<sub>4</sub>S<sub>2</sub> *m/z* 352.0677 [M+NH<sub>4</sub>]<sup>+</sup>, found 352.0678 (0.3 ppm). The data were consistent with literature.<sup>[7]</sup>

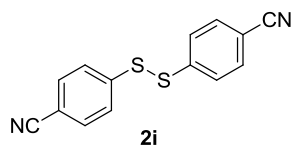

**4,4'-Disulfanediyldibenzonitrile 2i.** The product was obtained according to the procedure D from 4-cyanobenzenesulfonyl chloride (2.50 g, 12.4 mmol). **2i** was obtained by filtration of the reaction mixture to yield a white solid (1.06 g, 64%). **R<sub>f</sub>** (petroleum ether/diethyl ether = 80:20): 0.20. **mp**:



188-189 °C. **<sup>1</sup>H NMR** (CDCl<sub>3</sub>, 300.1 MHz): δ 7.64-7.51 (m, 8H). **<sup>13</sup>C NMR** (CDCl<sub>3</sub>, 75.5 MHz): δ 142.0, 132.7, 126.4, 118.1, 110.8. **IR** (cm<sup>-1</sup>) v: 2924, 2224, 1588, 1483, 1398, 1179, 1071, 1015, 817, 539. **HRMS** (EI) calcd for C<sub>14</sub>H<sub>8</sub>N<sub>2</sub>S<sub>2</sub> *m/z* 268.01289 [M]<sup>+</sup>, found 268.01412 (4.59 ppm). The data were consistent with literature.<sup>[7]</sup>

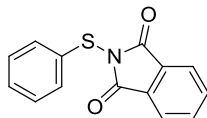

**4a**

**2-(Phenylthio)isoindoline-1,3-dione 4a.** The product was synthesized according to the procedure for the synthesis of 2-(phenylthio)isoindoline-1,3-dione from phthalimide (0.80 g, 5.87mmol, 1.05 eq.). **4a** was obtained by filtration as a white solid (0.60 g, 42%). **R<sub>f</sub>** (petroleum ether/diethyl ether 80:20): 0.24. **mp**: 162-163 °C. **<sup>1</sup>H NMR** (CDCl<sub>3</sub>, 300.1 MHz): δ 7.97-7.89 (m, 2H), 7.82-7.73 (m, 2H), 7.64-7.57 (m, 2H), 7.38-7.28 (m, 3H). **<sup>13</sup>C NMR** (CDCl<sub>3</sub>, 75.5 MHz): δ 167.7, 135.0, 134.7, 131.9, 130.9, 129.3, 124.0. **IR** (cm<sup>-1</sup>) v: 3052, 1714, 1471, 1374, 1216, 1083, 886, 765, 715. **HRMS** (ESI) calcd for C<sub>14</sub>H<sub>13</sub>N<sub>2</sub>O<sub>2</sub>S *m/z* 273.0698 [M+NH<sub>4</sub>]<sup>+</sup>, found 273.0704 (2.2 ppm). The data were consistent with literature.<sup>[8]</sup>

## 7. References

- [1] Y. Arai, G. Ando, T. Koike, M. Akita, *Chem. Eur. J.* **2016**, 22, 1262-1265.
- [2] G. K. S. Prakash, C. Weber, S. Chacko, G. A. Olah, *Org. Lett.* **2007**, 9, 1863-1866.
- [3] P. Ivashkin, G. Lemonnier, J. Cousin, V. Grégoire, D. Labar, P. Jubault, X. Pannecoucke, *Chem. Eur. J.* **2014**, 20, 9514-9518.
- [4] R. S. Sengar, V. N. Nemykin, P. Basu, *New J. Chem.* **2003**, 27, 1115-1123.
- [5] G. W. Kabalka, M. S. Reddy, M.-L. Yao, *Tetrahedron Lett.* **2009**, 50, 7340-7342.
- [6] S. E. Denmark, E. Hartmann, D. J. P. Kornflit, H. Wang, *Nat. Chem.* **2014**, 6, 1056-1064.
- [7] Y. Zheng, F.-L. Qing, Y. Huang, X.-H. Xu, *Adv. Synth. Catal.* **2016**, 358, 3477-3481.
- [8] Z. Song, Y. Wu, T. Xin, C. Jin, X. Wen, H. Sun, Q.-L. Xu, *Chem. Commun.* **2016**, 52, 6079-6082.

## 8. Copies of $^1\text{H}$ , $^{13}\text{C}$ and $^{19}\text{F}$ NMR spectra

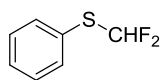

7.50  
7.50  
7.48  
7.47  
7.35  
7.35  
7.33  
7.32  
7.31  
7.30  
7.29  
7.28  
7.27  
7.26  
7.25  
7.23  
7.22  
6.91  
6.72  
6.53

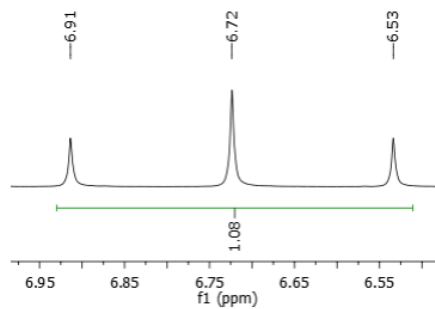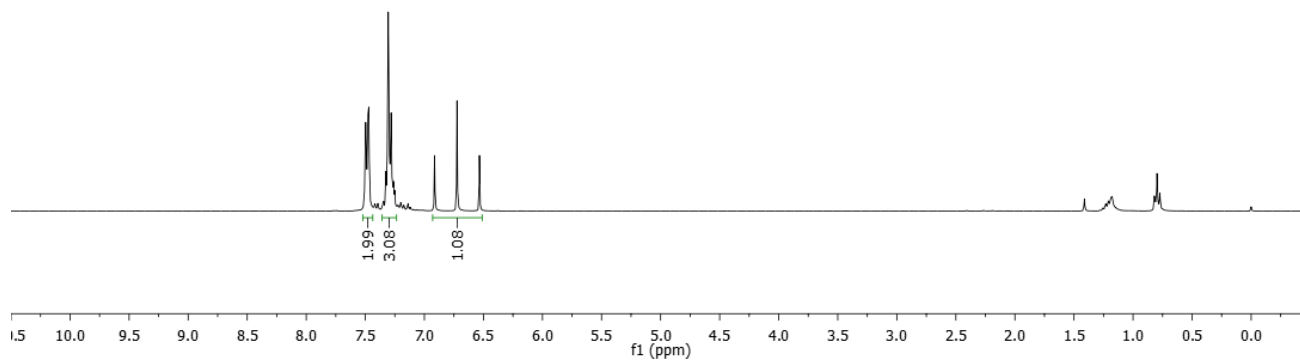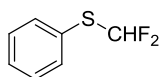

135.3  
129.7  
129.3  
126.1  
126.1  
126.0  
124.7  
121.0  
117.4

77.4  
77.0  
76.6

126.1  
126.1  
126.0

124.7

121.0

117.4

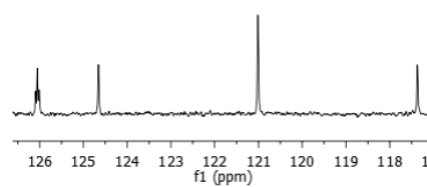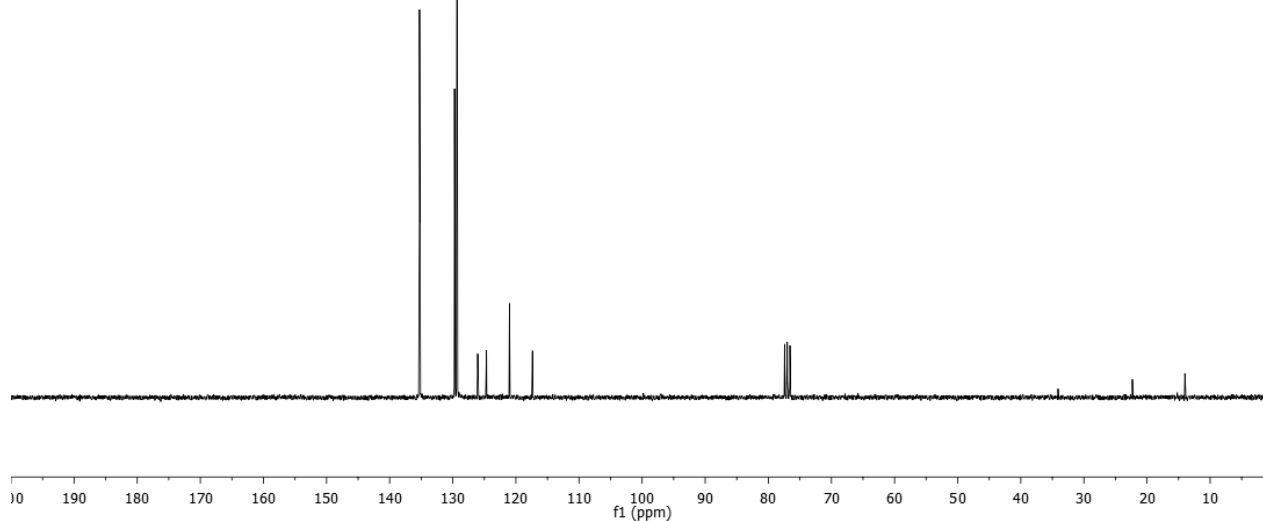

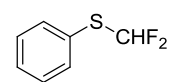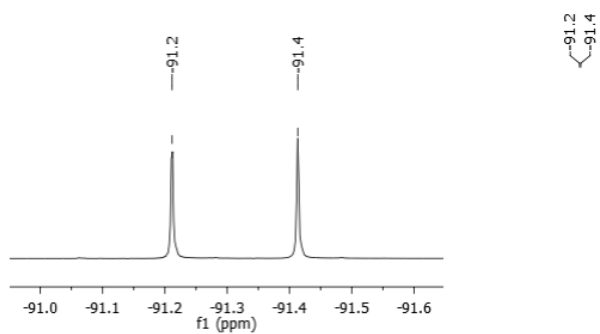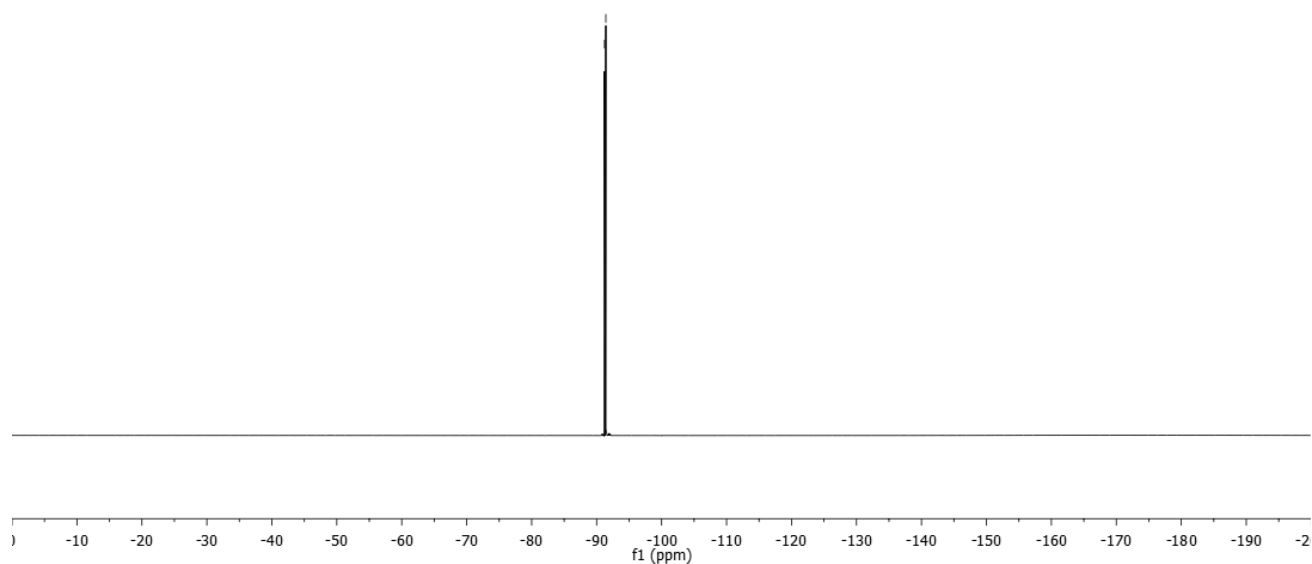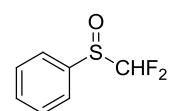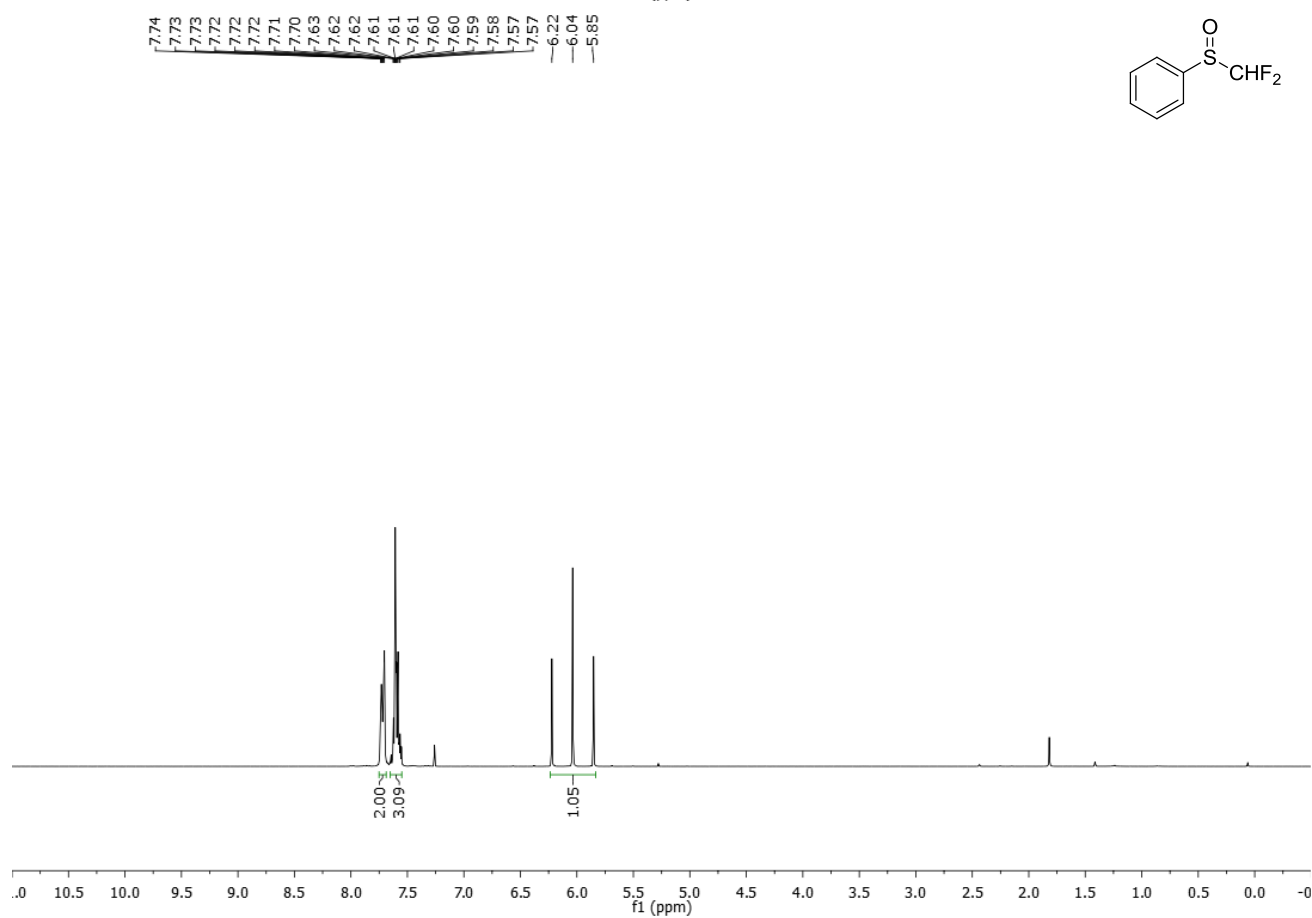

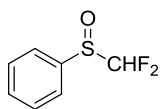

136.8  
136.7  
136.7  
133.0  
129.7  
125.6  
124.8  
121.0  
117.2

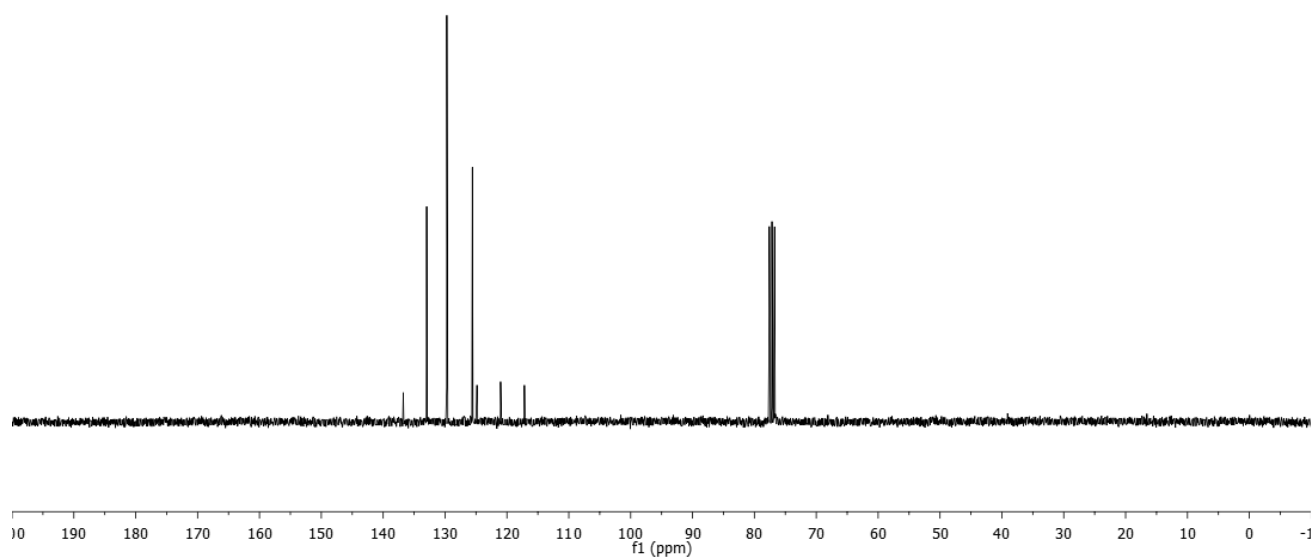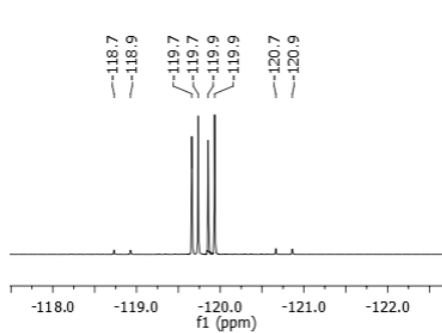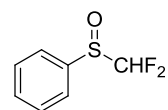

118.7  
118.9  
119.7  
119.7  
119.9  
119.9  
120.7  
120.9

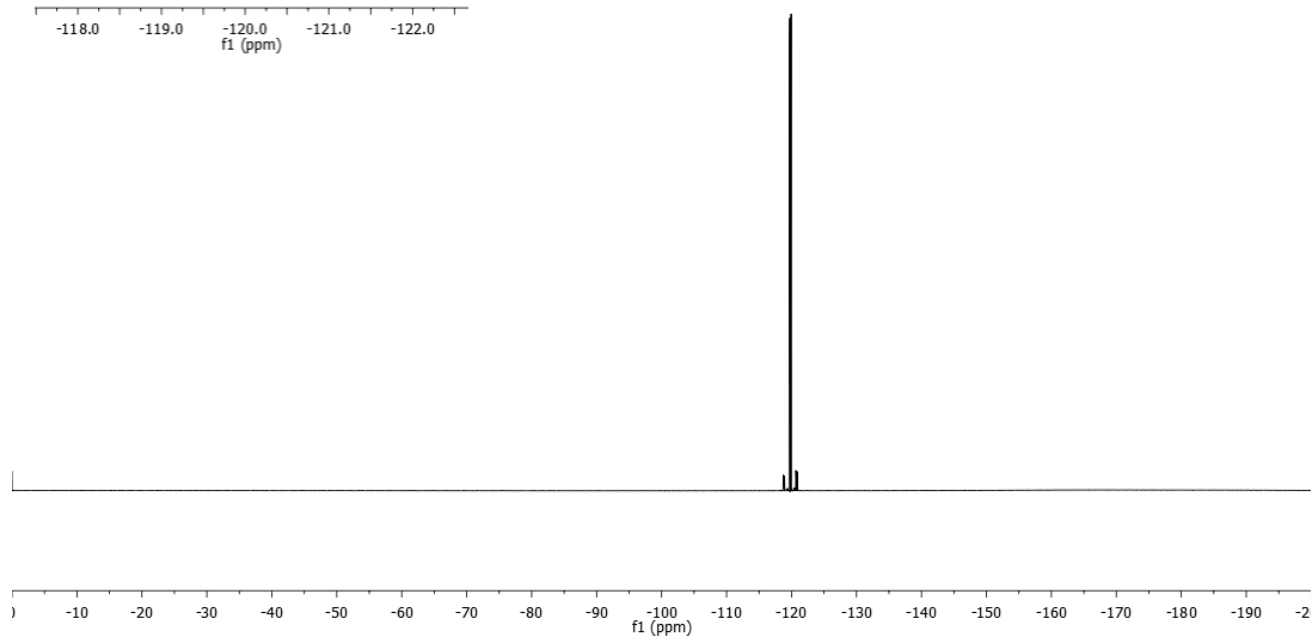

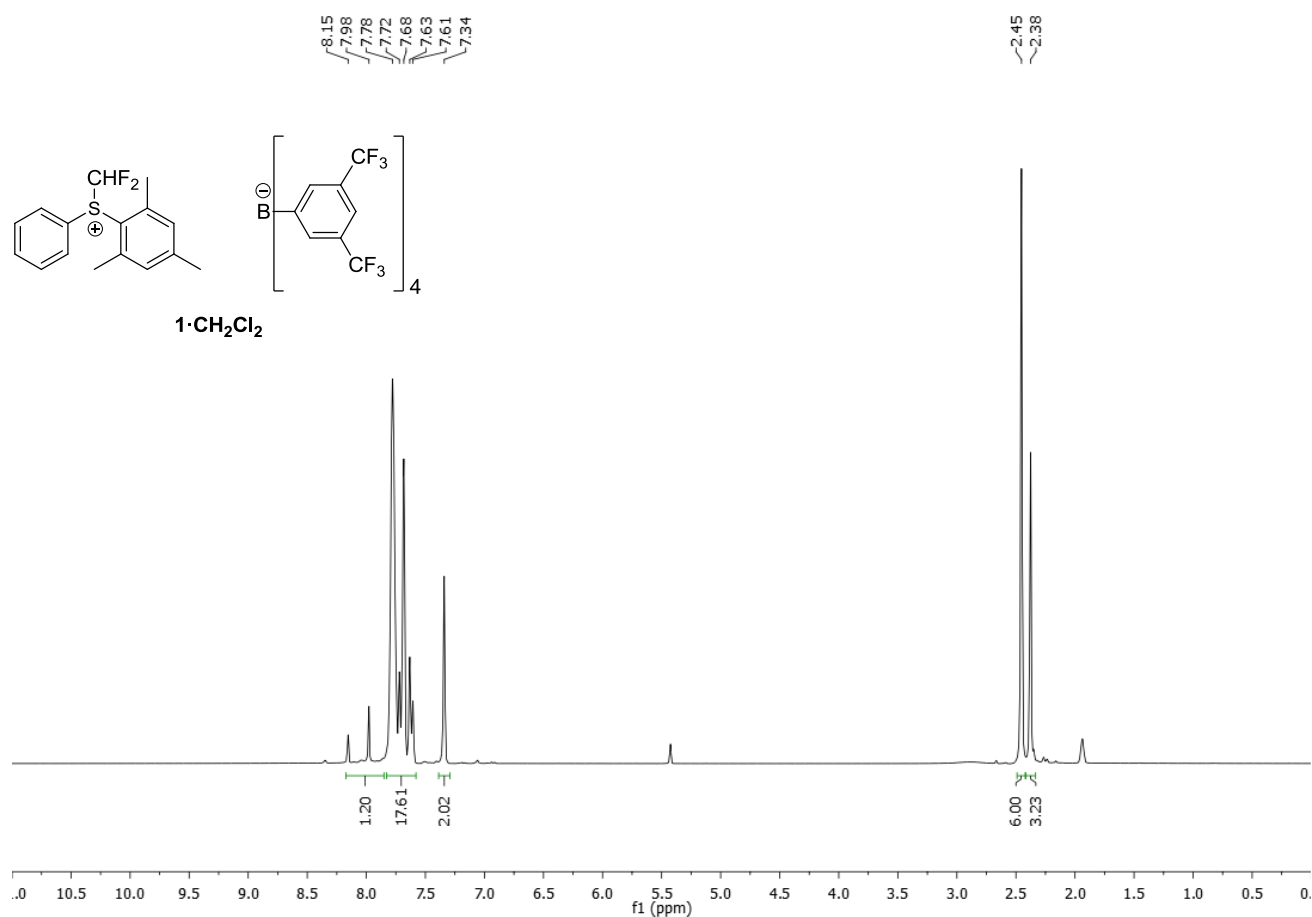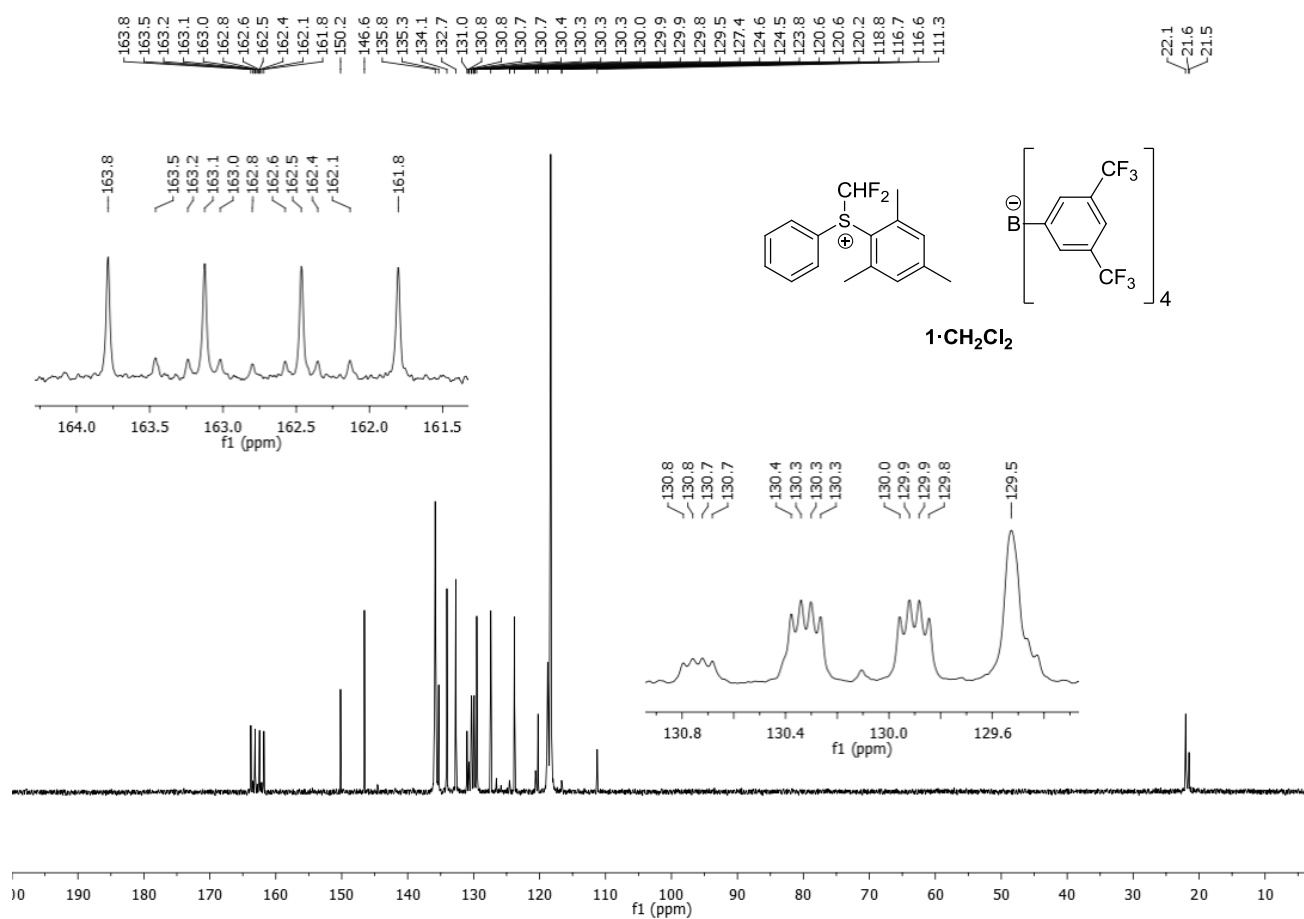

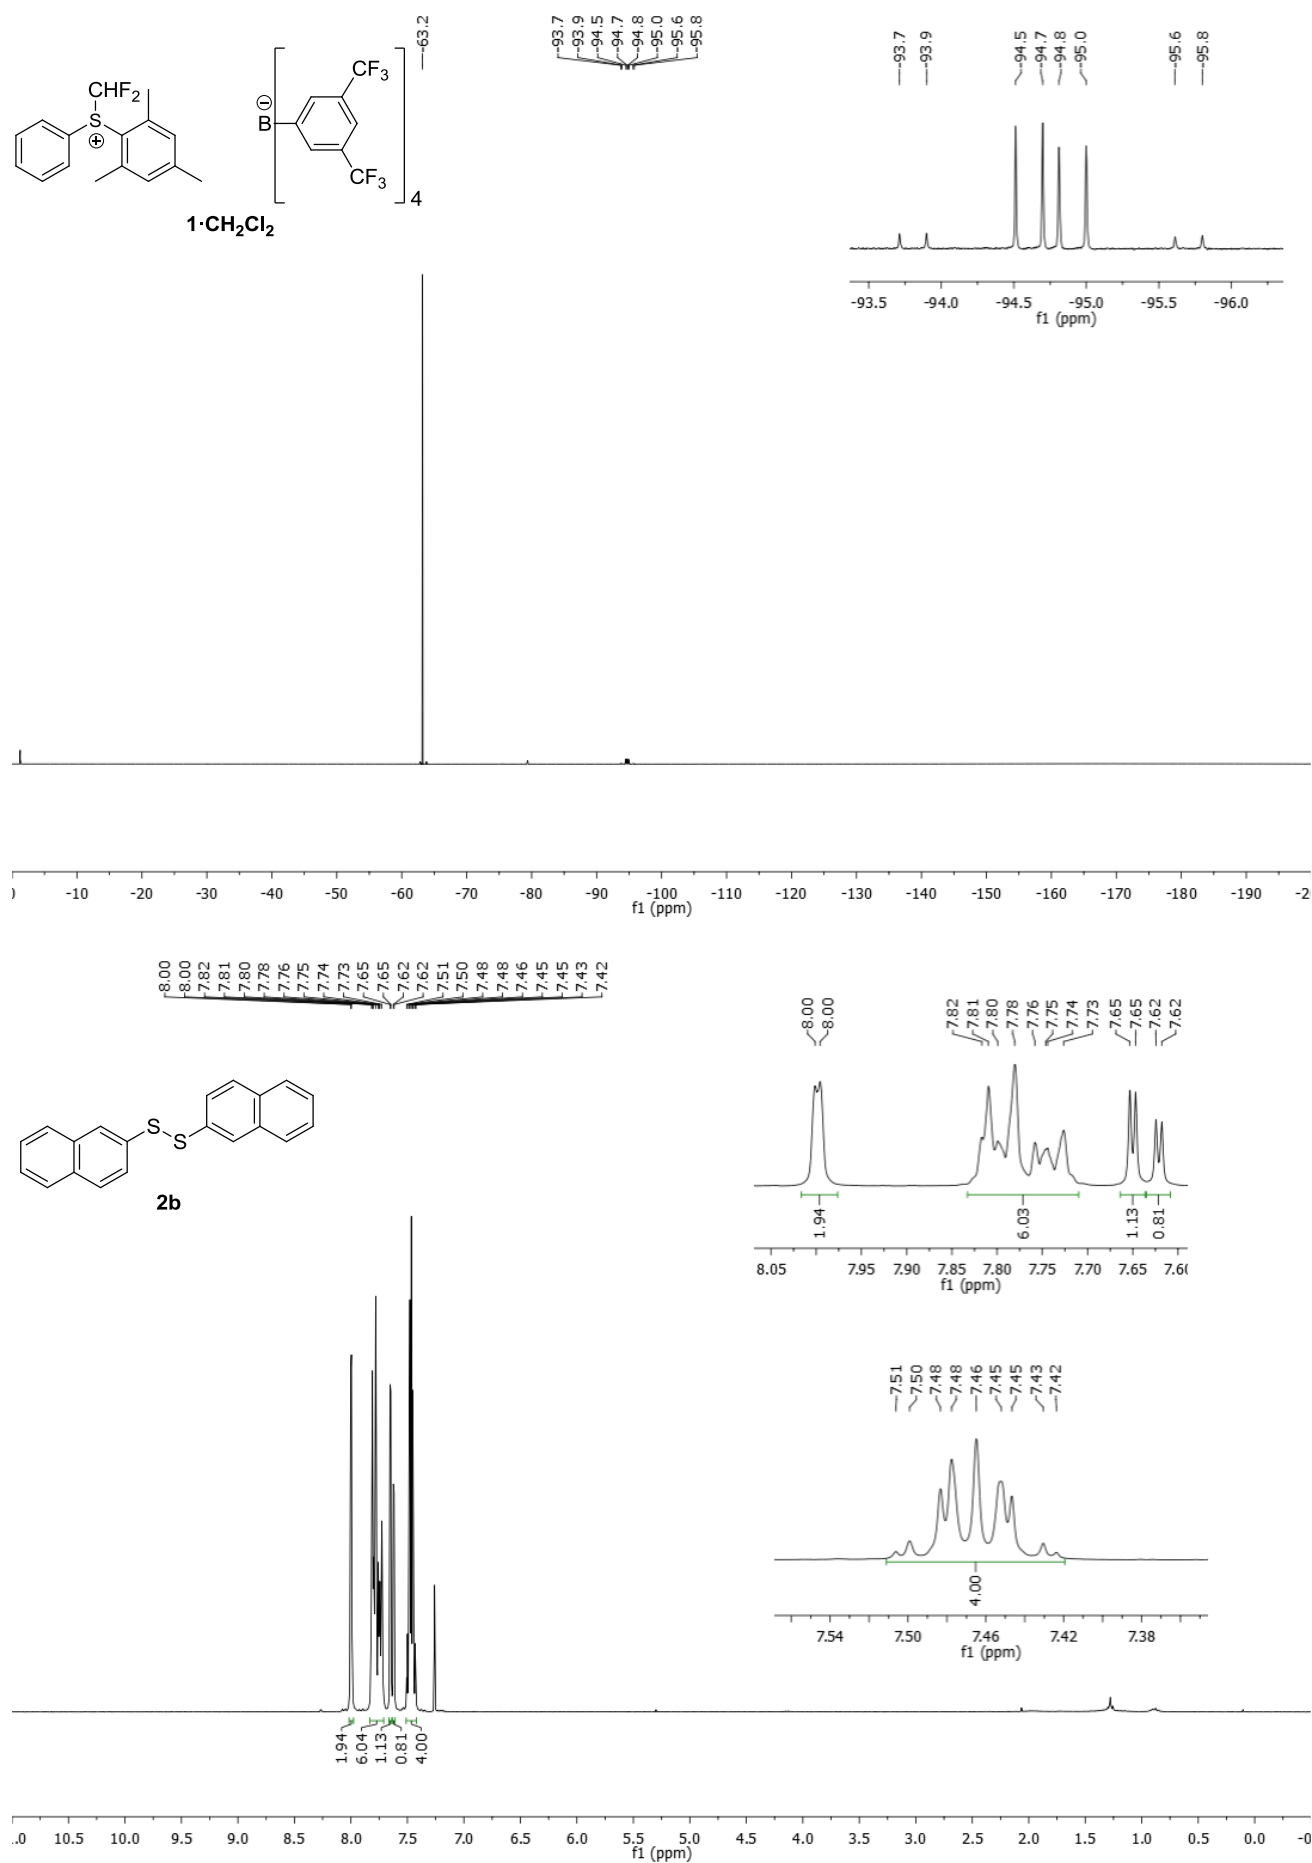

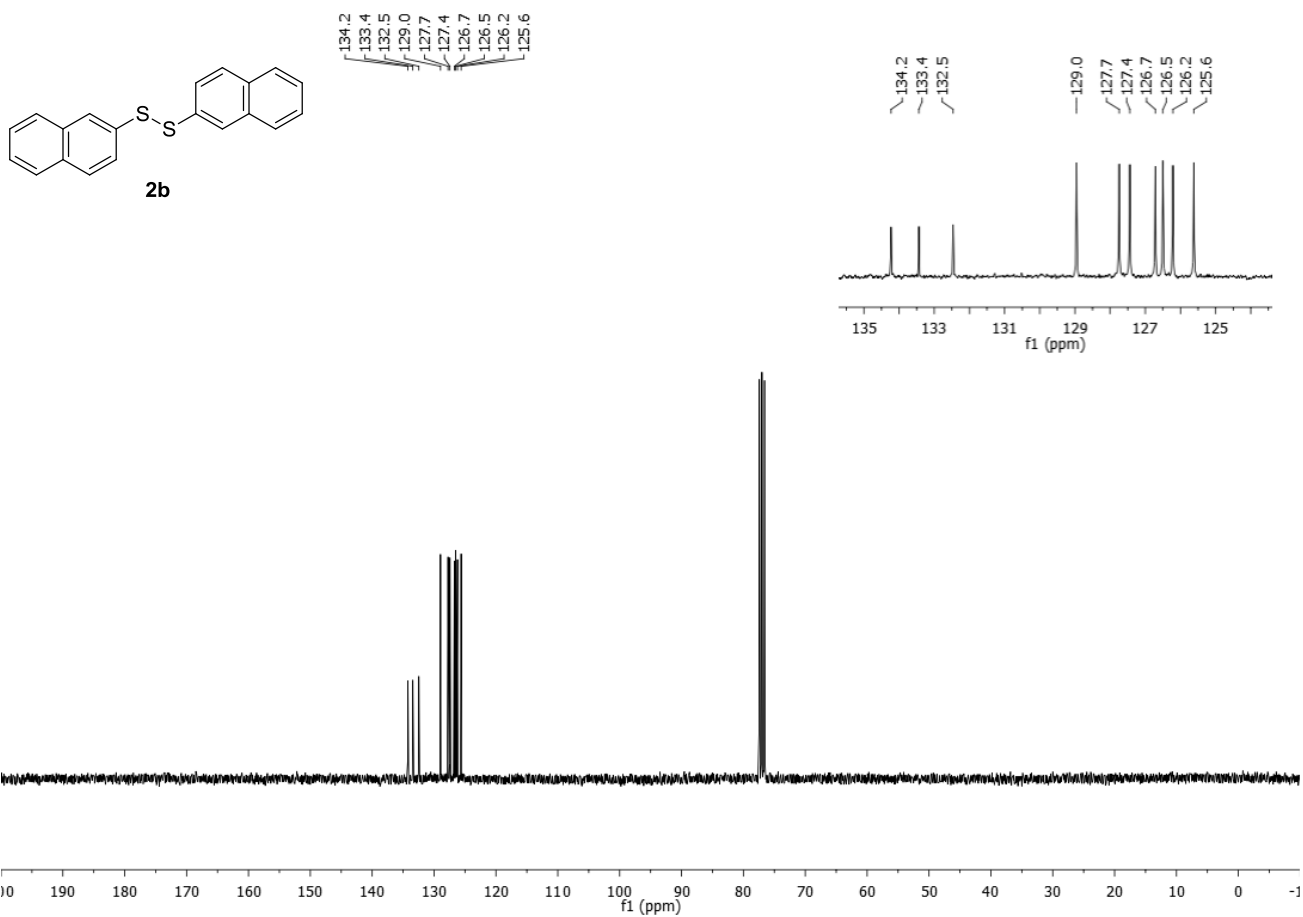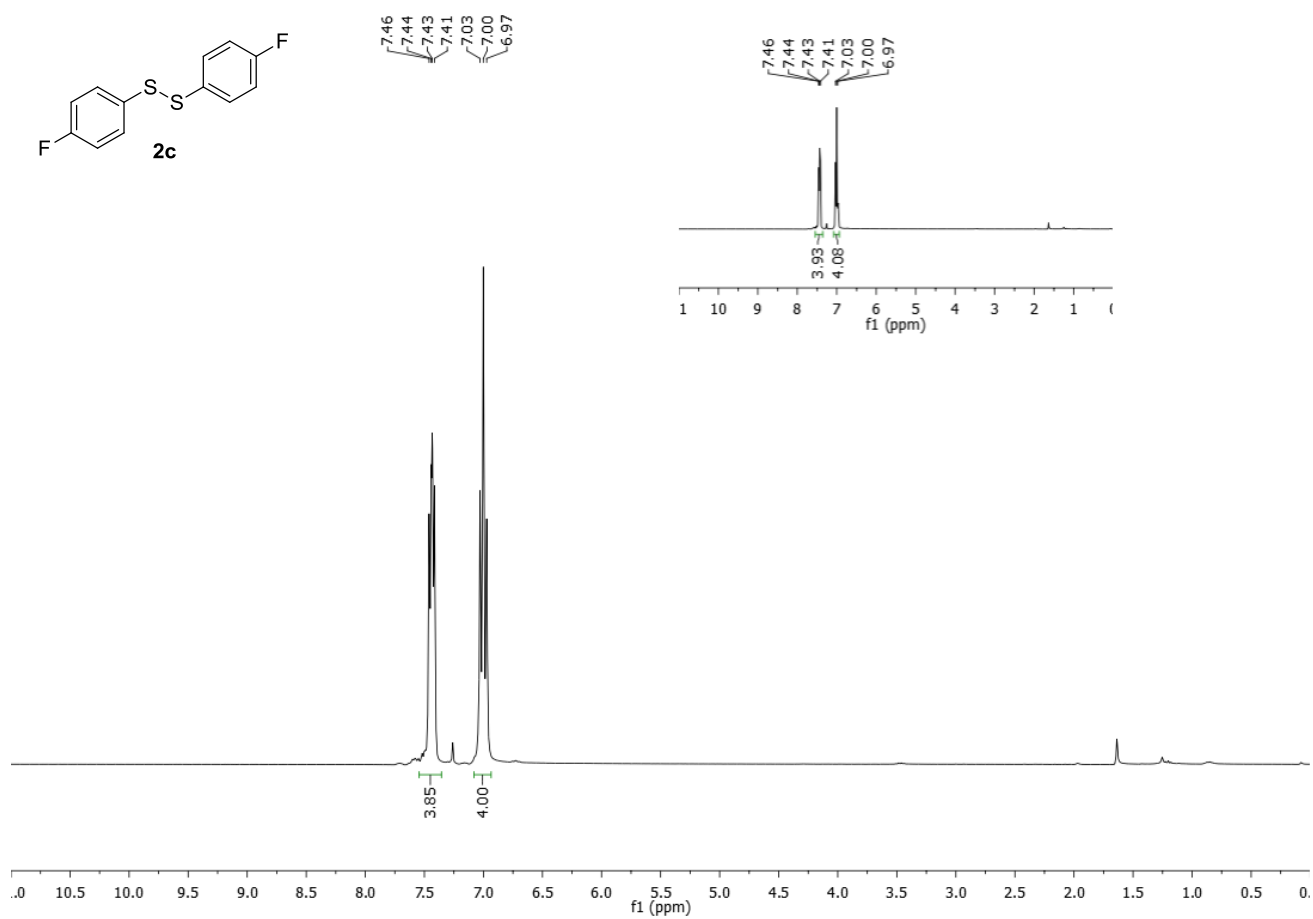





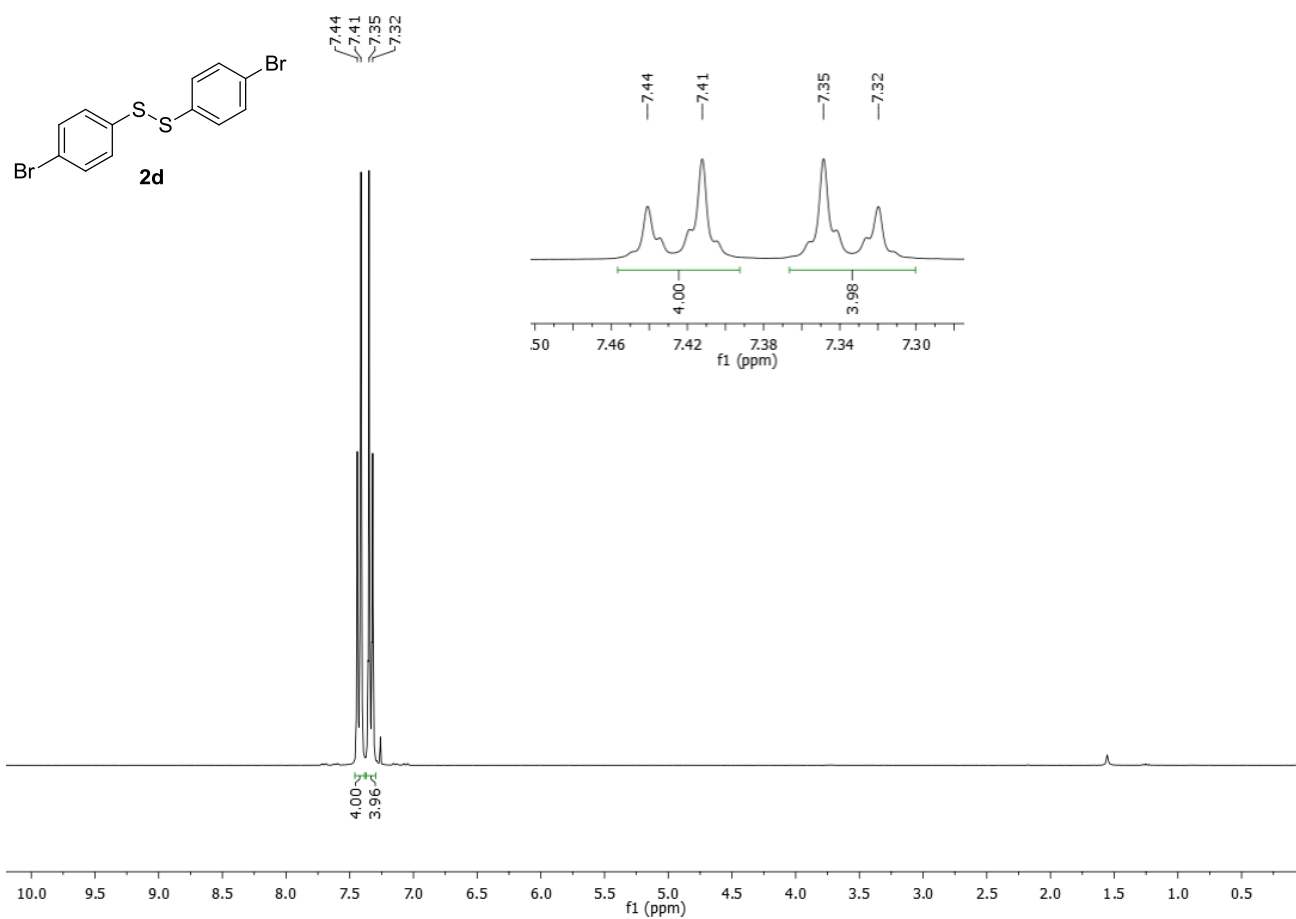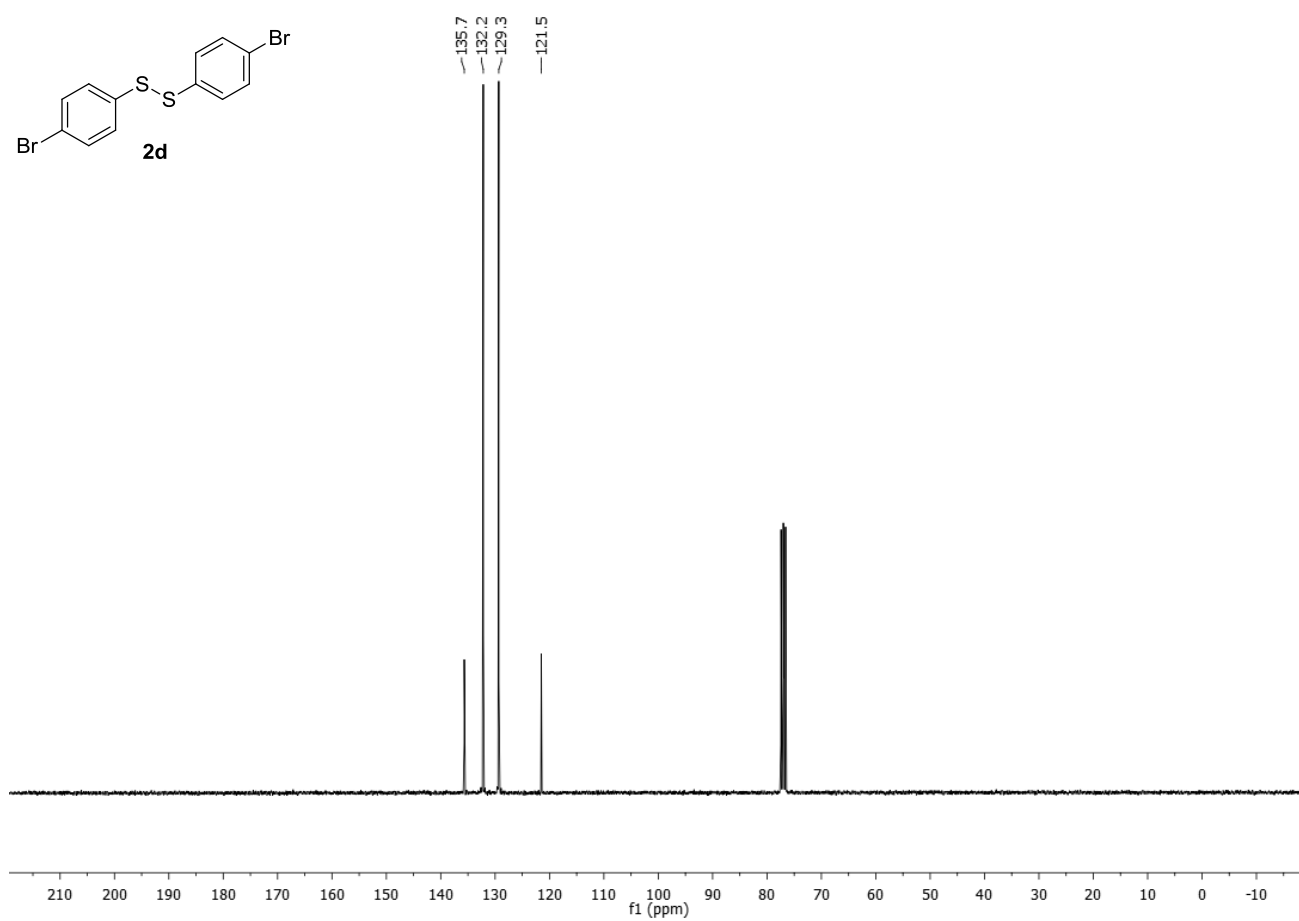

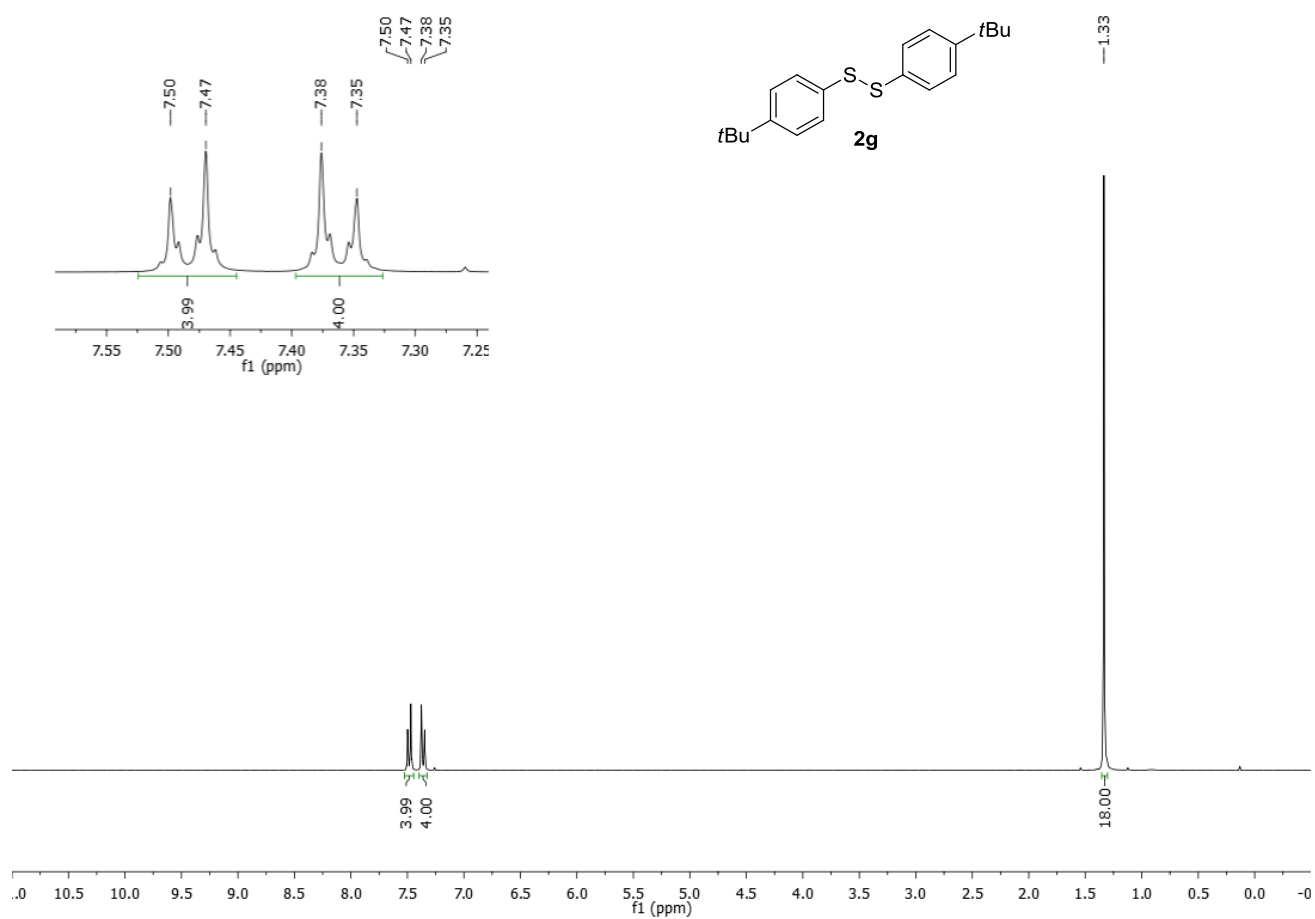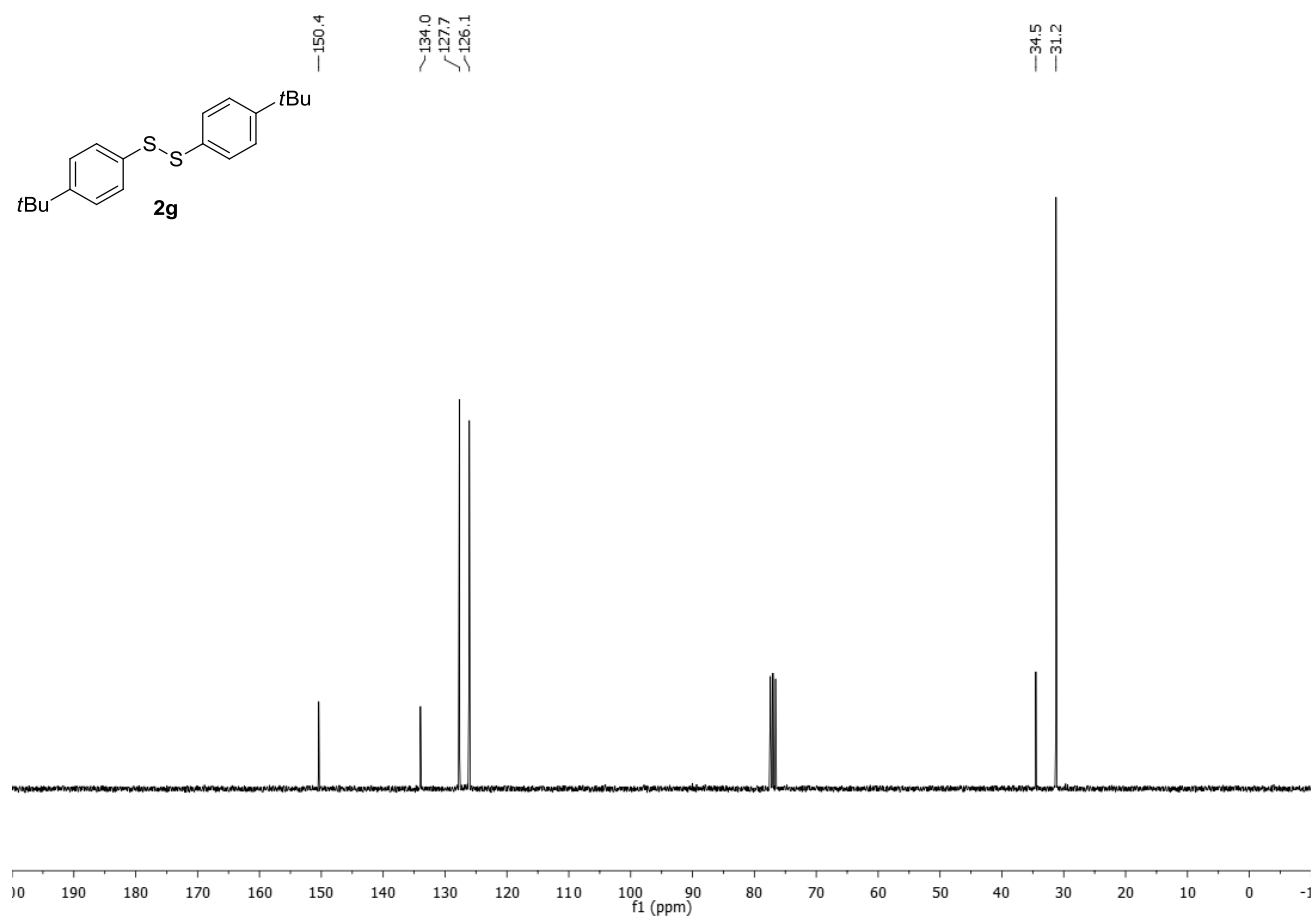

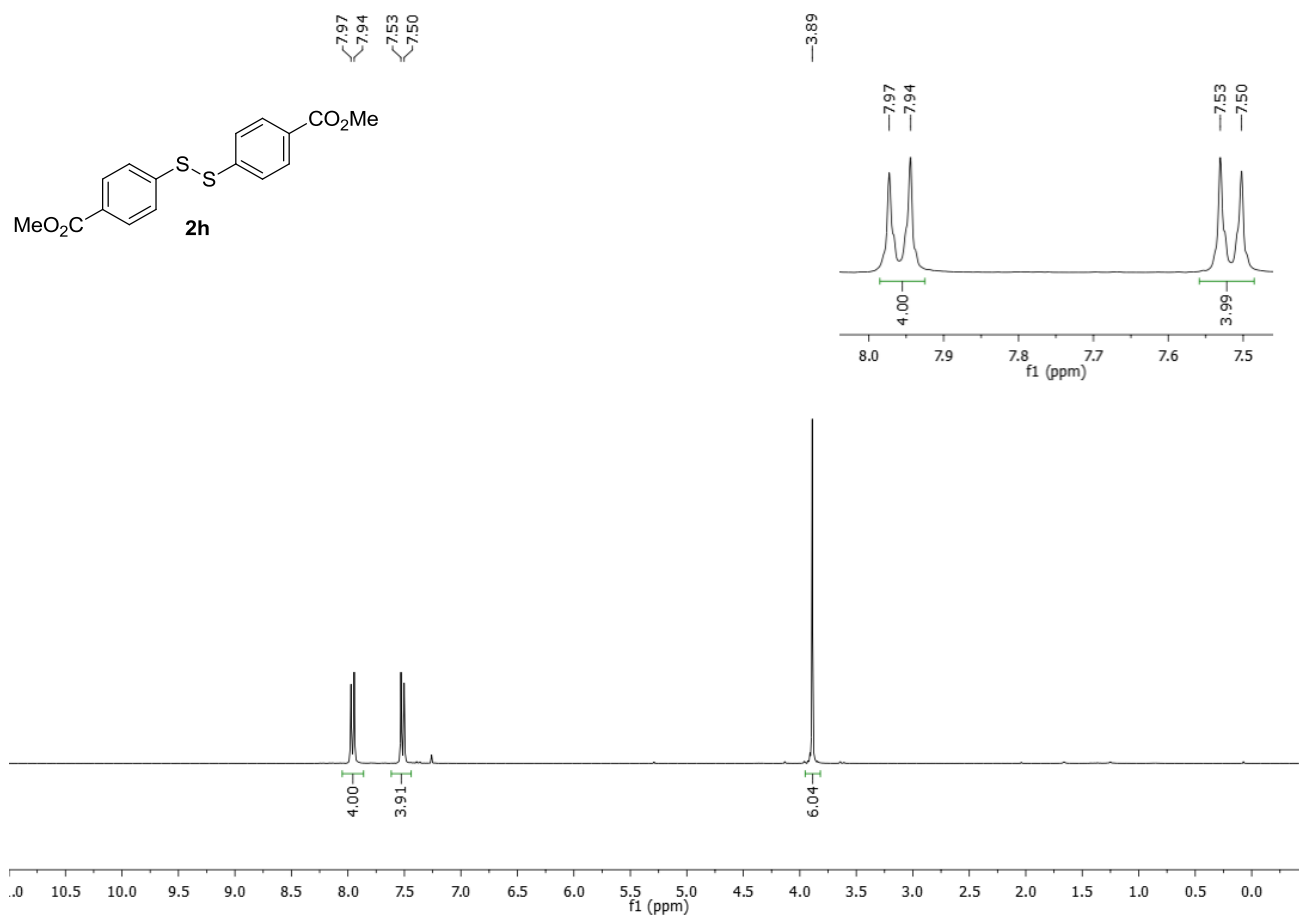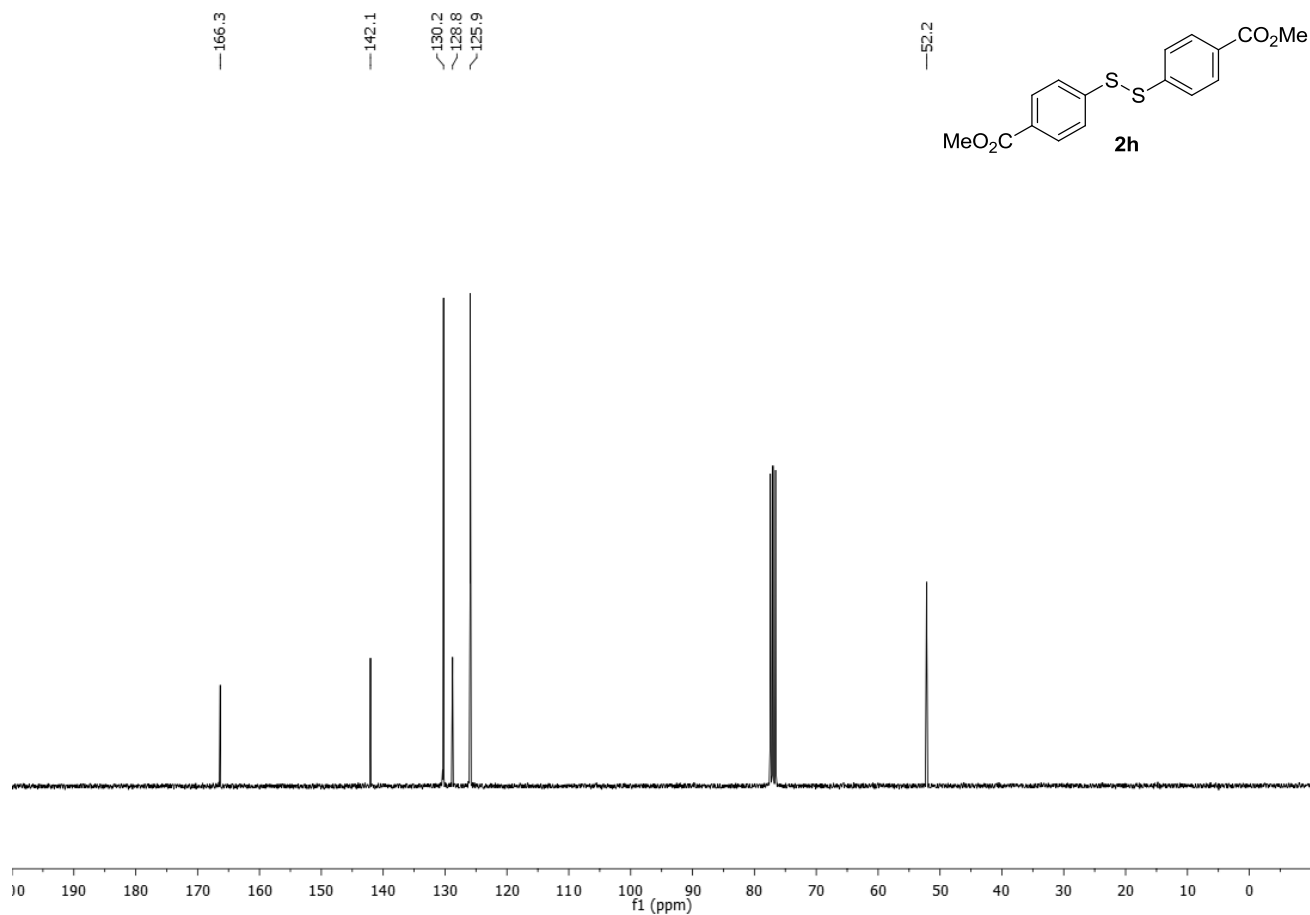

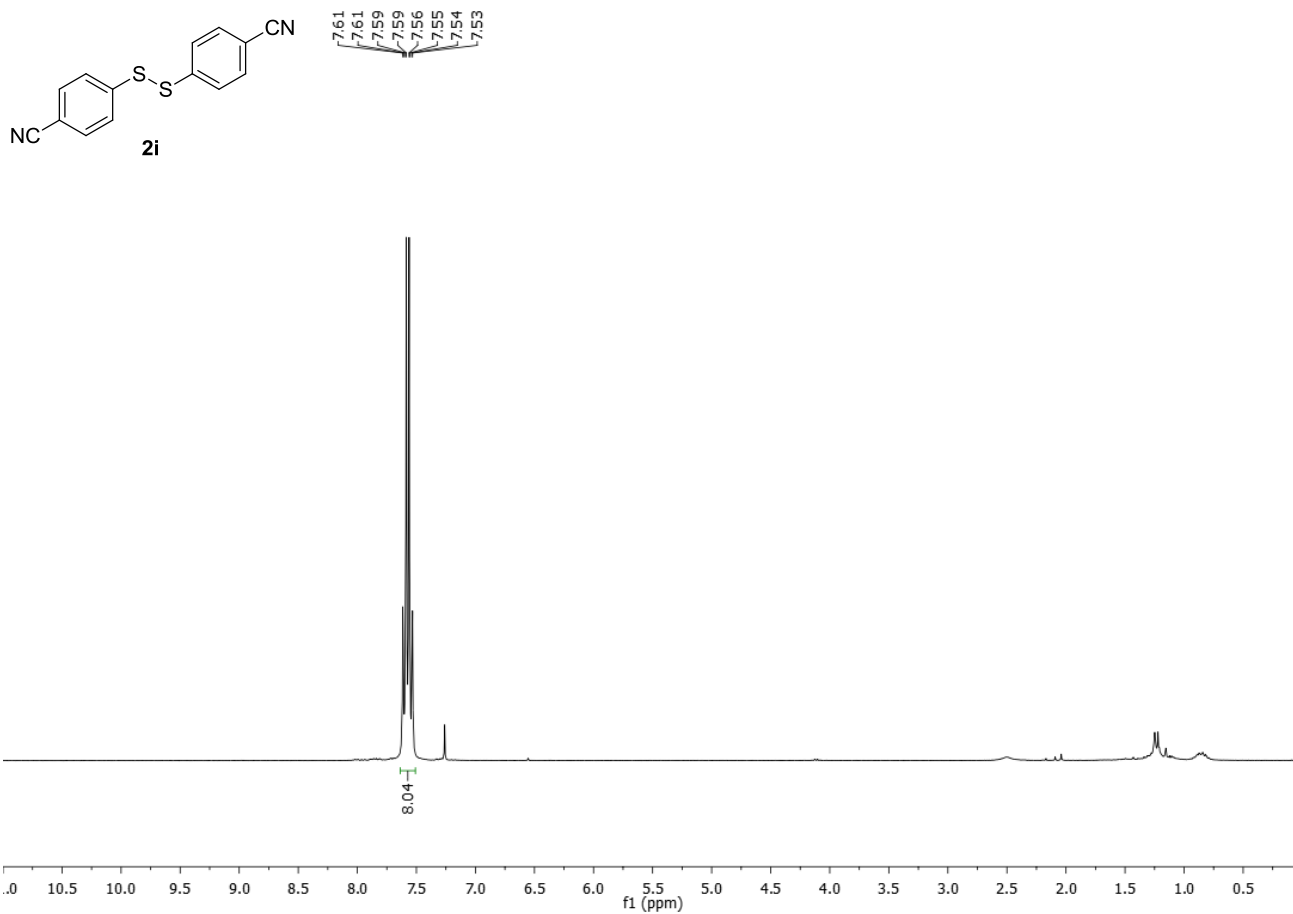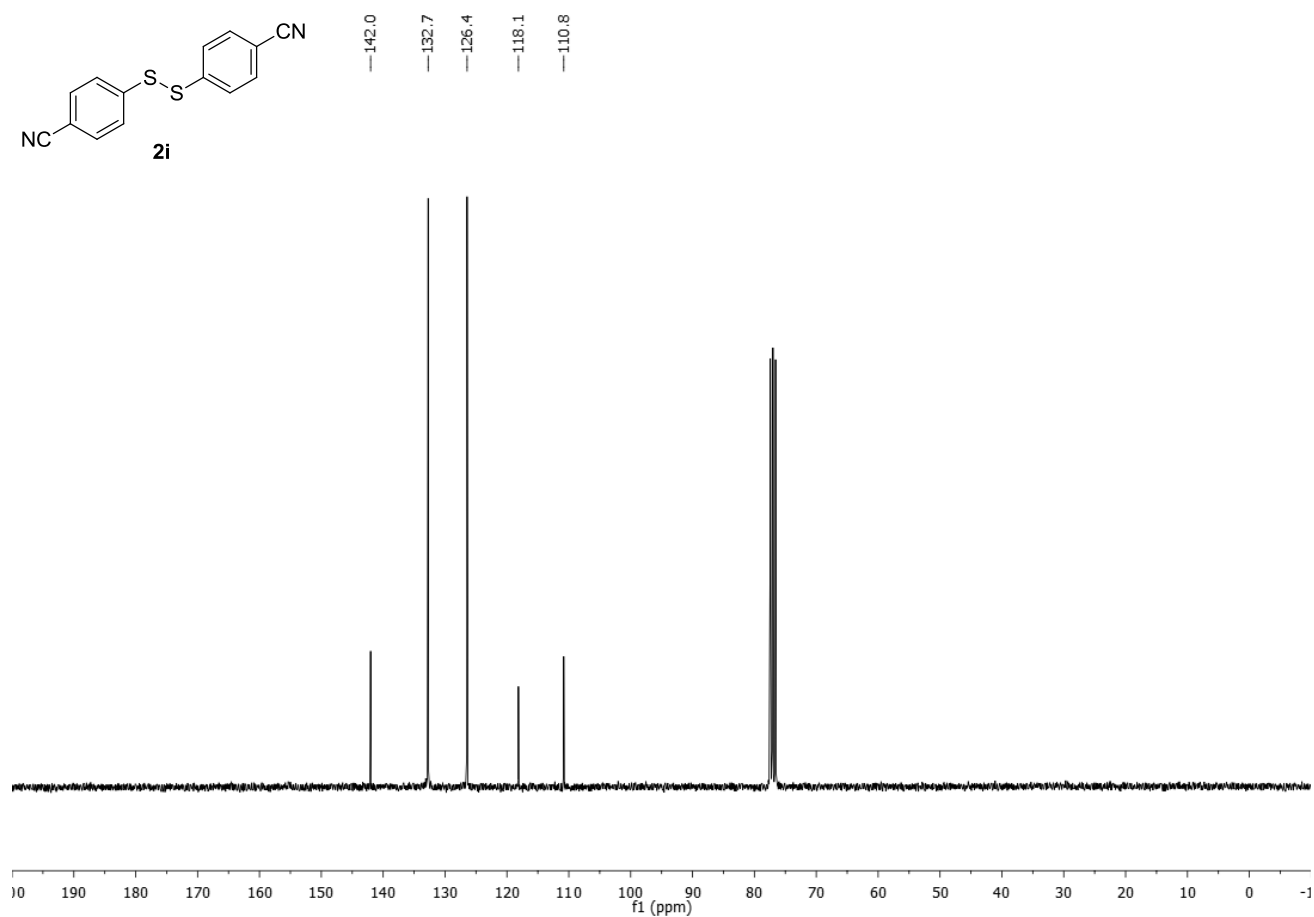

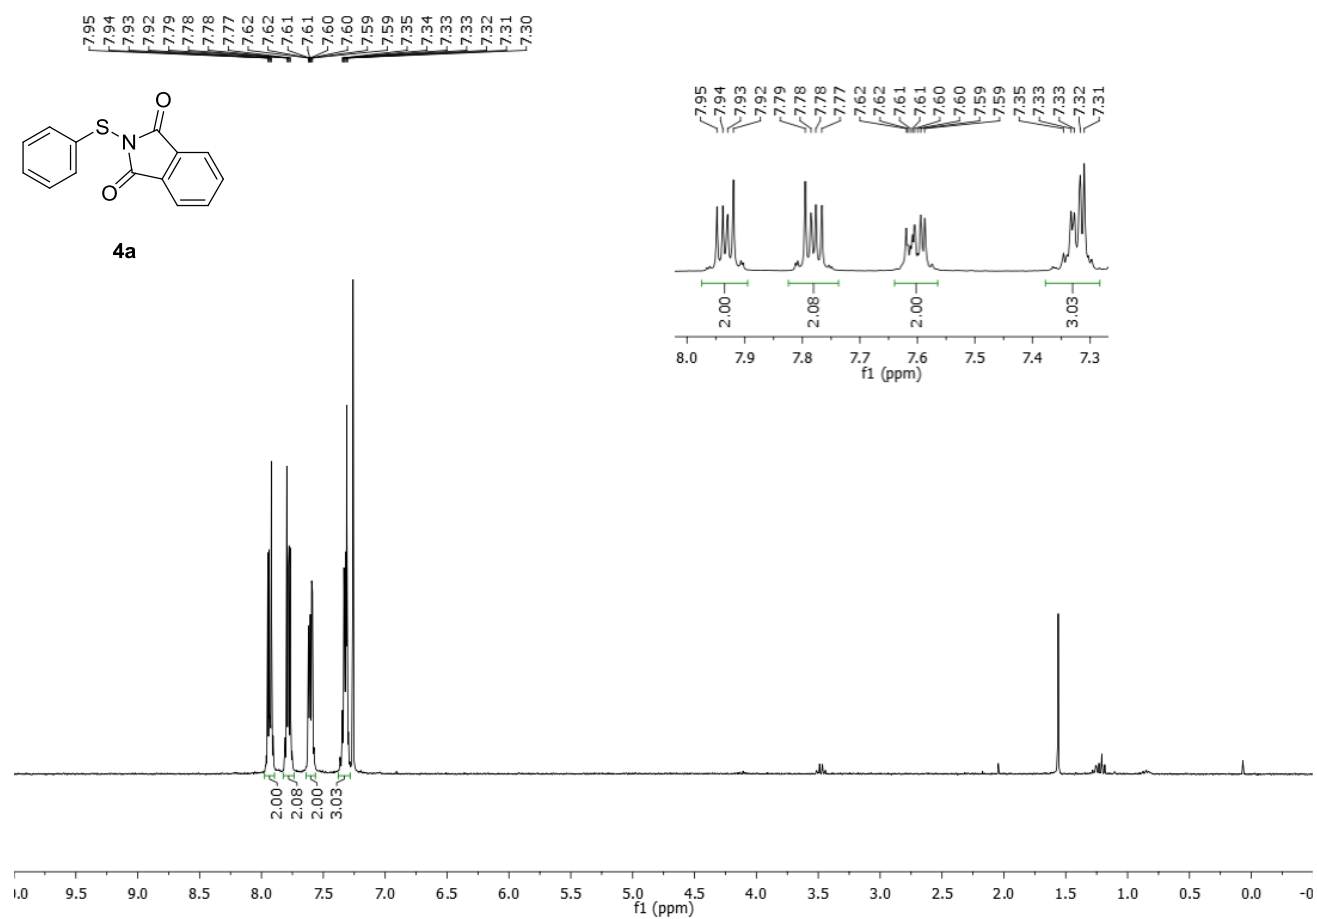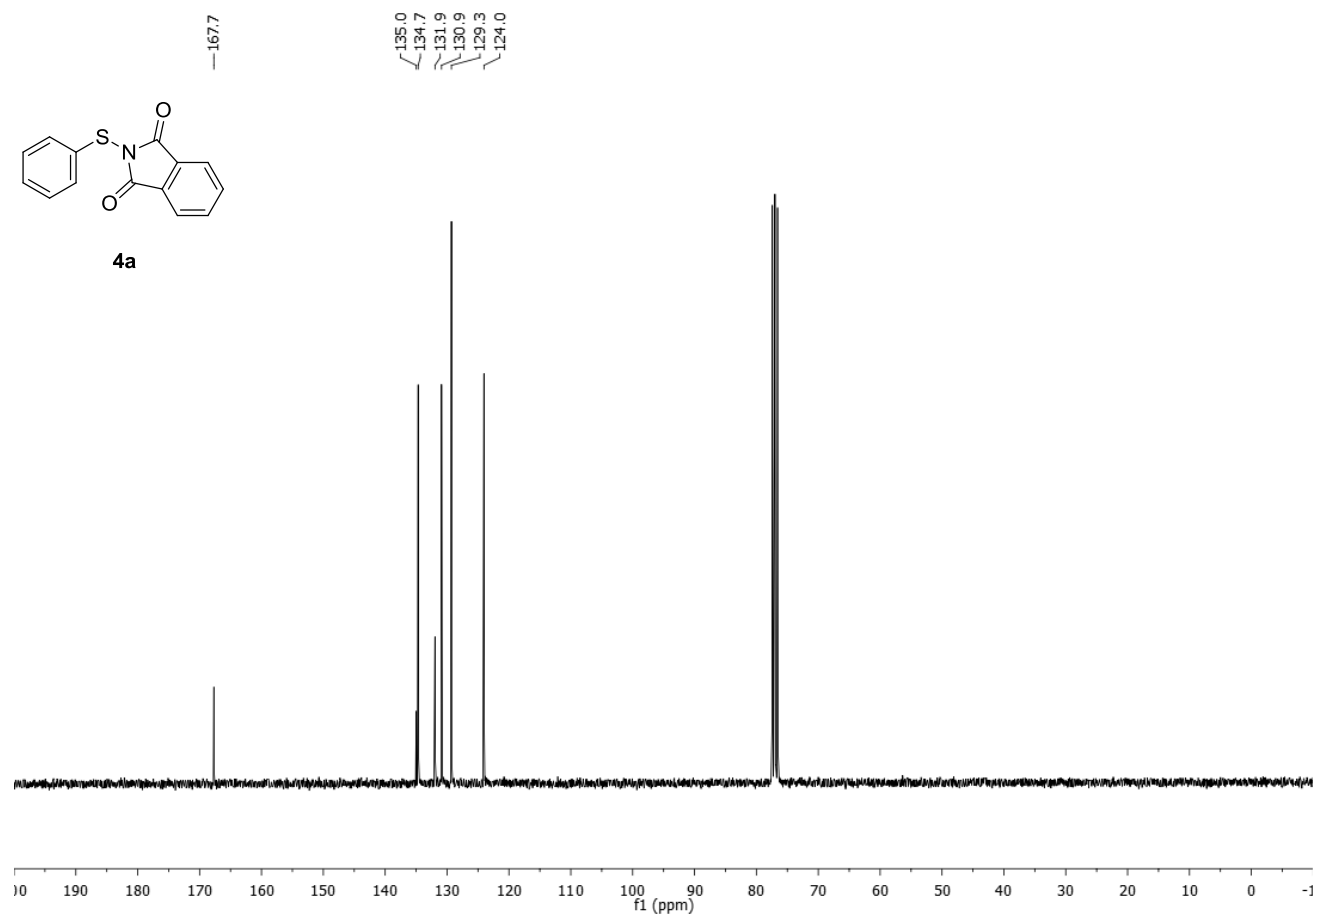



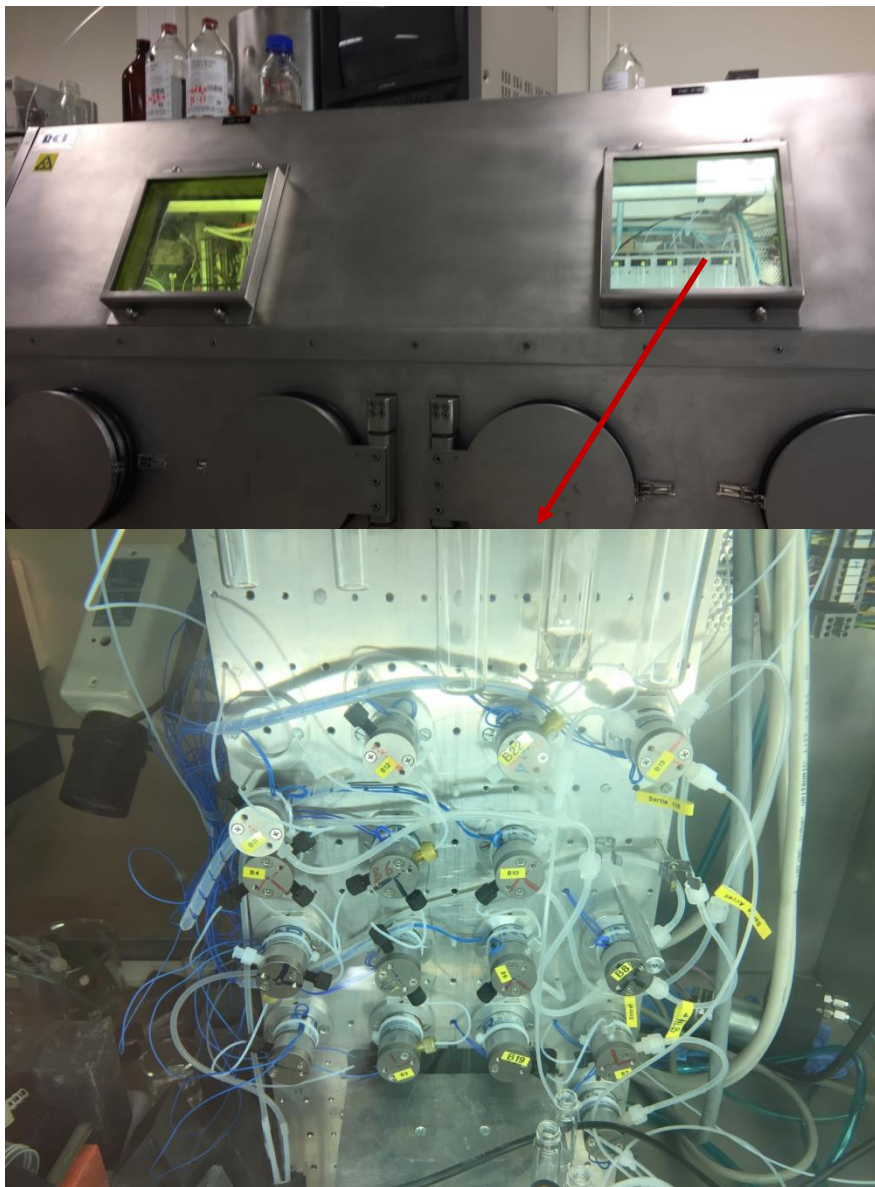

Scheme 2: pictures of the home-made remote controlled module

A 5 mL vial was used for the basic solution (n°1), a 5 mL vial was used for PhCN (n°3), a 5 mL tube equipped with a septum and a stirring bar was used as the F<sup>-</sup> reactor (n°4) and a 5-mL tube equipped with a septum and a stirring bar was used as the S<sup>+</sup> reactor (n°5). A 8 mL tube equipped with a septum and a stirring bar was used as the final reactor n°6. The whole apparatus was washed (first with water then acetone) and dried under nitrogen. The S<sup>+</sup> reactor and the F<sup>-</sup> one were dried in an oven at 130 °C for 30 minutes and cooled down to RT under a nitrogen atmosphere. Note: for compound **2b**, a 20-mL tube was used as the final reactor n°6.

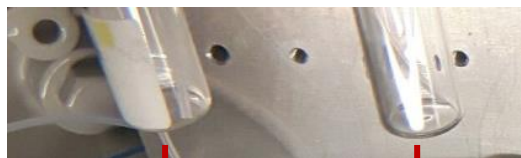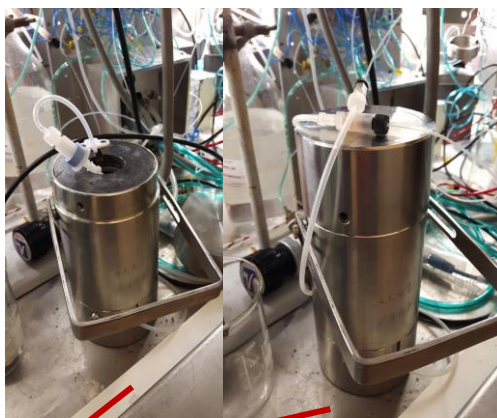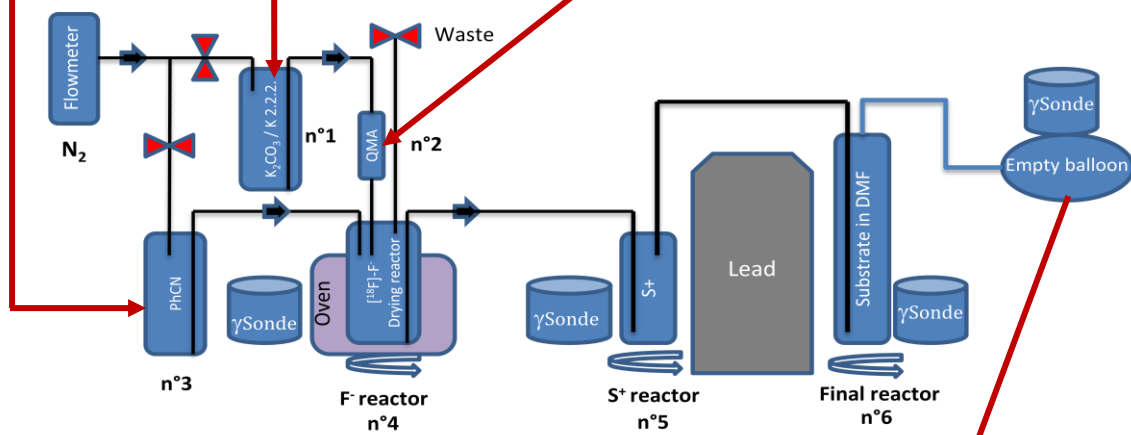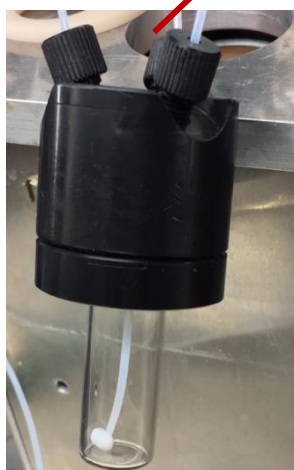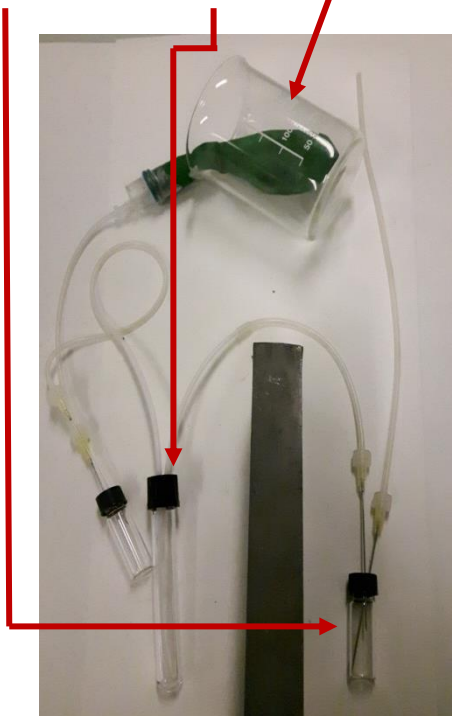



#### 4. Typical procedure for the [ $^{18}\text{F}$ ]-trifluoromethylation reaction.

The typical procedure was depicted for **2a** and the similar procedure was used for all other substrates.

Note: for compound **2b**, the quantities of DMF, Et<sub>2</sub>O and water were increased by two.

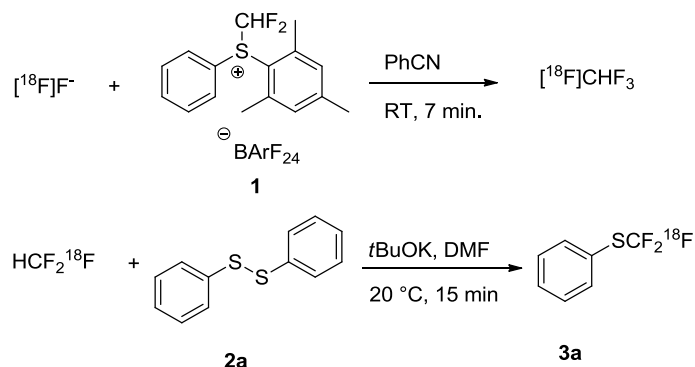

The S<sup>+</sup> reactor n°5 charged with **1** and the final reactor n°6 charged under air with *t*BuOK (0.12 g, 1.04mmol, 13.2 eq.) and **2a** (0.23 g, 1.04mmol, 13.2 eq.) were quickly connected to the remote controlled module and isolated from the F<sup>-</sup> reactor n°4 thanks to a 2-way valve. Nitrogen was passed through for 5 min. The flask n°3 containing PhCN (1 mL), the one containing the basic mixture for the elution of the cartridge n°1 and the [<sup>18</sup>F]fluoride cartridge n°2 were connected to the remote controlled module.

[<sup>18</sup>F]Fluoride was released from QMA to the F<sup>-</sup> reactor n°4 using the basic solution from the flask n°1. The activity was measured (reactor n°4). [<sup>18</sup>F]Fluoride was then dried at 95 °C under a stream of nitrogen and magnetic stirring. After 7 minutes, 0.5 mL of CH<sub>3</sub>CN was added at 95°C and the [<sup>18</sup>F]fluoride was dried at 95°C. The same operation was repeated twice with two additional portions of CH<sub>3</sub>CN (0.5 mL each) in the interval of 3 min. [<sup>18</sup>F]Fluoride was diluted with 1 mL of PhCN at 95 °C and then cooled down to 20 °C. DMF (2 mL) was added in the final reactor n°6 under stirring at 20 °C and an empty balloon was connected to the final reactor n°6. The solution of [<sup>18</sup>F]fluoride in PhCN of the F<sup>-</sup> reactor n°4 was then transferred to the S<sup>+</sup> reactor n°5 at 20 °C onto neat **1** (formation and distillation of the HCF<sub>2</sub><sup>18</sup>F).

When the activity distillation was stopping (when the signal of transferred radioactivity showed the beginning of a plateau, after about 5 minutes), the submerged tube from the S<sup>+</sup> reactor n°5 in the final reactor n°6 was lifted. The flow of nitrogen was stopped, the final reactor n°6 was isolated and the reaction mixture was stirred at 20 °C for 15 min. Et<sub>2</sub>O (2 mL) and water (1 mL) were then added. The final reactor n°6 was reconnected to the radiochemical apparatus and the residual HCF<sub>2</sub><sup>18</sup>F was eliminated by a nitrogen flow. Activities in the different reactors (reactor n°4, 5 and 6) were measured. Then, 5 µL of the aqueous layer and 5µL of the organic layer were separately analyzed by HPLC. The HPLC analysis (70:30 CH<sub>3</sub>CN/water) of the organic and aqueous layers showed the product of [<sup>18</sup>F]trifluoromethylthiolation **3a** and its radiochemical purity (retention time ca. 4.83 min,

>99% purity). The product **3a** was obtained in 73 % radiochemical yield ( $n = 3$ ).

#### Determination of the radiochemical yield (RCY) for **3a**

|                            | F <sup>-</sup> t <sub>0</sub> | F <sup>-</sup> t <sub>1</sub> | S <sup>+</sup> | S <sup>+</sup> t <sub>1</sub> | Final reactor | Final reactor t <sub>1</sub> |
|----------------------------|-------------------------------|-------------------------------|----------------|-------------------------------|---------------|------------------------------|
|                            | reactor n°4                   | reactor n°4                   | reactor n°5    | reactor n°5                   | reactor n°6   | reactor n°6                  |
| $\Delta t = t - t_0$ (min) | 0                             | 57 <sup>a</sup>               | /              | 54 <sup>a</sup>               | /             | 58 <sup>a</sup>              |
| A <sub>t1</sub> (mCi)      | /                             | 21.4                          | /              | 28.2                          | /             | 37.2                         |
| A <sub>0</sub> (mCi)       | 134.0                         | 30.7                          | 103.3          | 39.6                          | 63.7          | 53.6                         |
| RCY (%)                    | 53.6/63.7 = 84                |                               |                |                               |               |                              |

t<sub>0</sub> : correspond to the time when the procedure was started.

t<sub>1</sub> : correspond to the time when the reaction was quenched in the final reactor n°6 and when the different activities were measured.

A<sub>0</sub>(F<sup>-</sup> t<sub>0</sub>), A<sub>t1</sub>(F<sup>-</sup> t<sub>1</sub>), A<sub>t1</sub>(S<sup>+</sup> t<sub>1</sub>), A<sub>t1</sub>(Final reactor t<sub>1</sub>) were measured.

A<sub>0</sub> activities were obtained by calculation according to the decay-corrected activities ( $A_0 = A_t / \exp(-0.693 \times (\Delta t/t_{1/2}))$ ).

a : For practical reasons, the three activities were not measured simultaneously.

### 5. Determination of the specific activity

The specific activity was determined starting from 130 mCi of [<sup>18</sup>F]fluoride.

#### Calibration curve and calculation for [<sup>18</sup>F]phenyl(trifluoromethyl)sulfane **3a**

The analysis were performed according to the following conditions: eluent: 60:40 CH<sub>3</sub>CN/H<sub>2</sub>O, flow = 1.0mL/min,  $\lambda = 254$  nm.

| [C <sub>6</sub> H <sub>4</sub> SCF <sub>3</sub> ] (mol.L <sup>-1</sup> ) | Area (mV) |
|--------------------------------------------------------------------------|-----------|
| 0.01                                                                     | 2470      |
| 0.001                                                                    | 247       |
| 0.0001                                                                   | 34.1      |

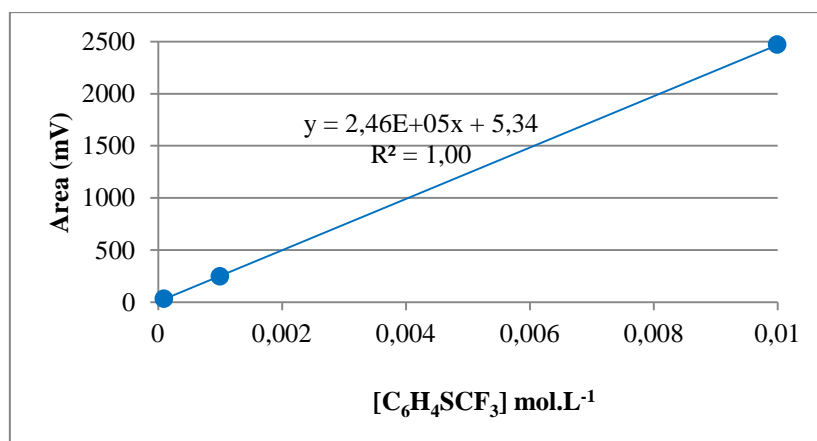

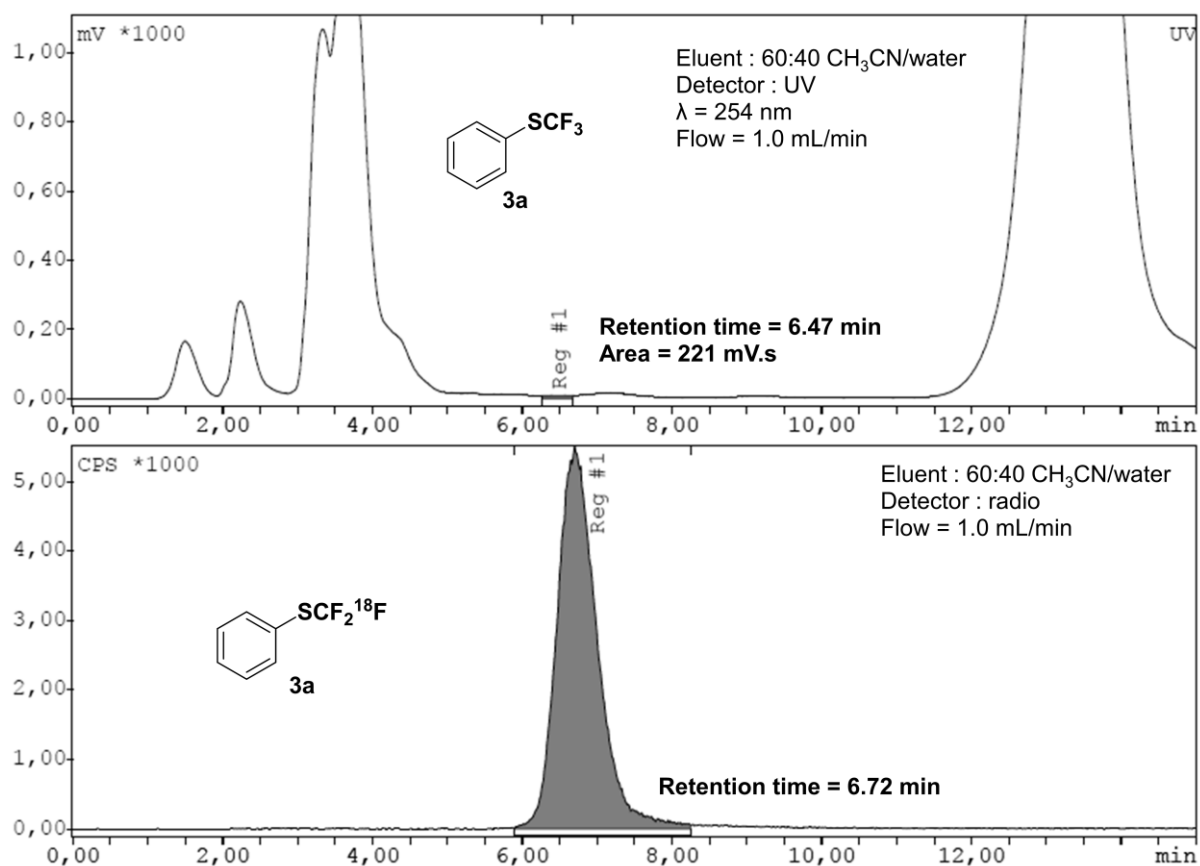

A sample of 1.1 mL of organic layer was used to determine the specific activity. The activity of this sample was measured at  $t$  and the decay-corrected activity  $A_0$  was calculated ( $A_0 = A_t / \exp(-0.693 \times (\Delta t/t_{1/2}))$ ).

|                            |      |
|----------------------------|------|
| $t_0$ (min)                | 596  |
| $t$ (min)                  | 646  |
| $\Delta t = t - t_0$ (min) | 50   |
| $A(t)$ (mCi)               | 4,05 |
| $A(0)$ (mCi)               | 5,55 |

The sample was then analyzed by HPLC (5  $\mu$ L) in order to determine the concentration of the sample.

|                                                                          |          |
|--------------------------------------------------------------------------|----------|
| Volume of the total sample (mL)                                          | 1,1      |
| Area(C <sub>6</sub> H <sub>4</sub> SCF <sub>3</sub> ) (mV.s)             | 221      |
| [C <sub>6</sub> H <sub>4</sub> SCF <sub>3</sub> ] (mol.L <sup>-1</sup> ) | 8.77E-04 |
| n(C <sub>6</sub> H <sub>4</sub> SCF <sub>3</sub> )(mol)                  | 9.65E-07 |
| Specific activity (GBq. $\mu$ mol <sup>-1</sup> )                        | 0.21     |

### Calibration curve and calculation for [ $^{18}\text{F}$ ](4-chlorophenyl)(trifluoromethyl)sulfane **3e**

The analyses were performed according to the following conditions: eluent 60:40  $\text{CH}_3\text{CN}$ /water, flow = 1.0 mL/min,  $\lambda$  = 254 nm.

| [4-Cl-C <sub>6</sub> H <sub>4</sub> SCF <sub>3</sub> ] (mol.L <sup>-1</sup> ) | Area (mV) |
|-------------------------------------------------------------------------------|-----------|
| 0.01                                                                          | 6190      |
| 0.005                                                                         | 2960      |
| 0.001                                                                         | 629       |
| 0.0001                                                                        | 60.6      |

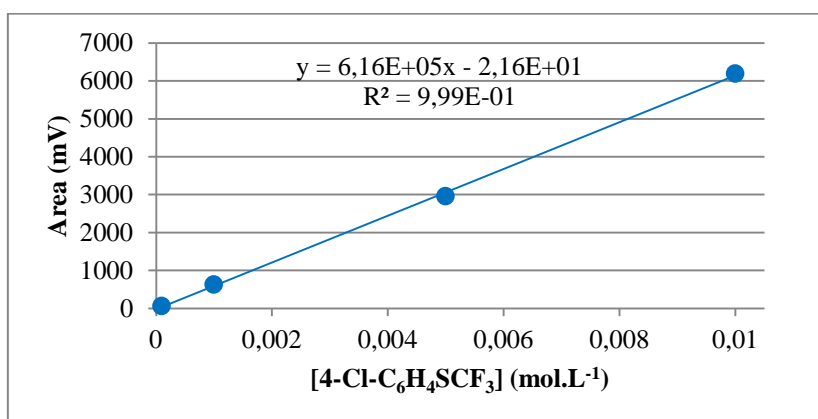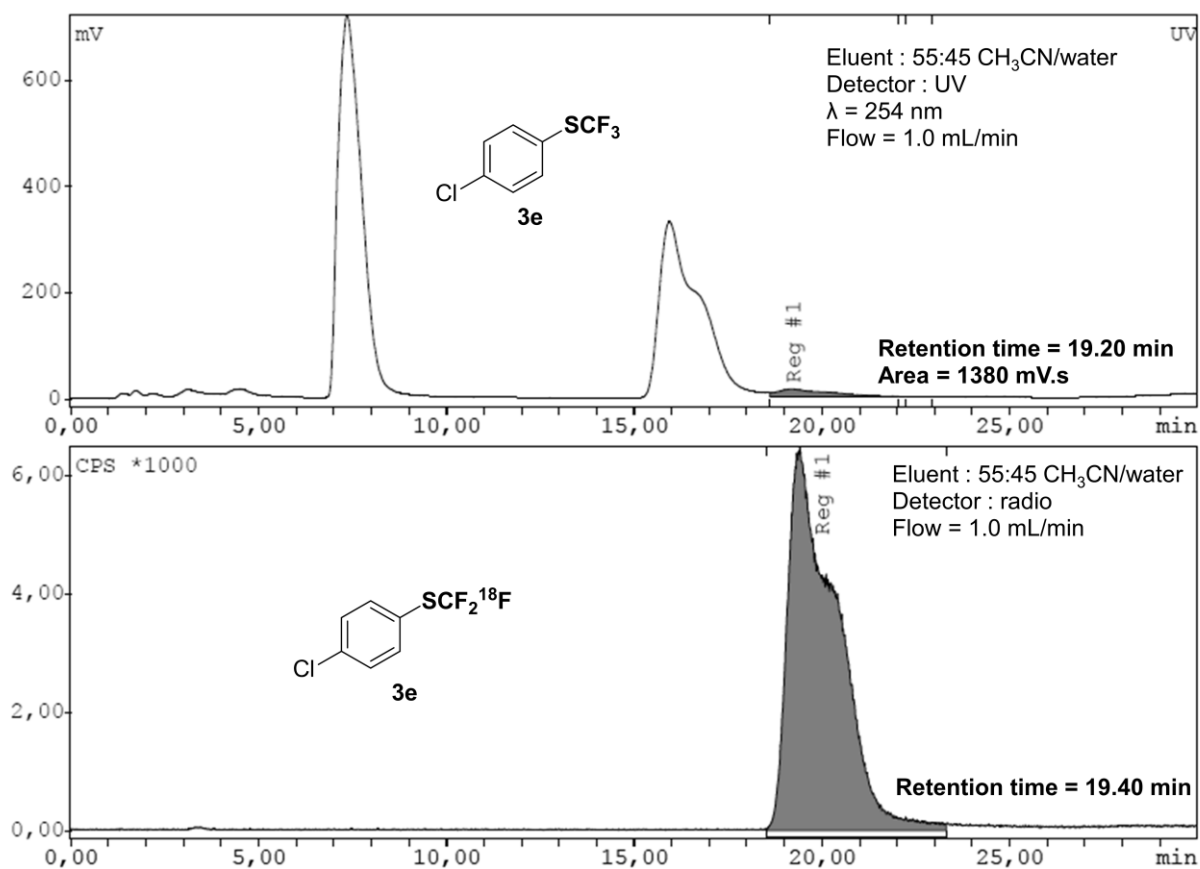

A sample of 1.0 mL of organic layer was used to determine the specific activity. The activity of this sample was measured at  $t$  and the decay-corrected activity  $A_0$  was calculated ( $A_0 = A_t / \exp(-0.693 \times (\Delta t/t_{1/2}))$ ).

|                            |       |
|----------------------------|-------|
| $t_0$ (min)                | 874   |
| $t$ (min)                  | 940   |
| $\Delta t = t - t_0$ (min) | 66    |
| $A(t)$ (mCi)               | 15.4  |
| $A(0)$ (mCi)               | 23.34 |

The sample was then analyzed by HPLC (5  $\mu$ L) in order to determine the concentration of the sample.

|                                                                               |             |
|-------------------------------------------------------------------------------|-------------|
| Volume of the total sample (mL)                                               | 1,0         |
| Area(4-Cl-C <sub>6</sub> H <sub>4</sub> SCF <sub>3</sub> ) (mV.s)             | 1380        |
| [4-Cl-C <sub>6</sub> H <sub>4</sub> SCF <sub>3</sub> ] (mol.L <sup>-1</sup> ) | 2.28E-03    |
| $n(4\text{-Cl-C}_6\text{H}_4\text{SCF}_3)$ (mol)                              | 2.28E-06    |
| <b>Specific activity (GBq.<math>\mu</math>mol<sup>-1</sup>)</b>               | <b>0.38</b> |

## 6. HPLC chromatograms of SCF<sub>2</sub><sup>18</sup>F-containing products

### [<sup>18</sup>F]Phenyl(trifluoromethyl)sulfane 3a

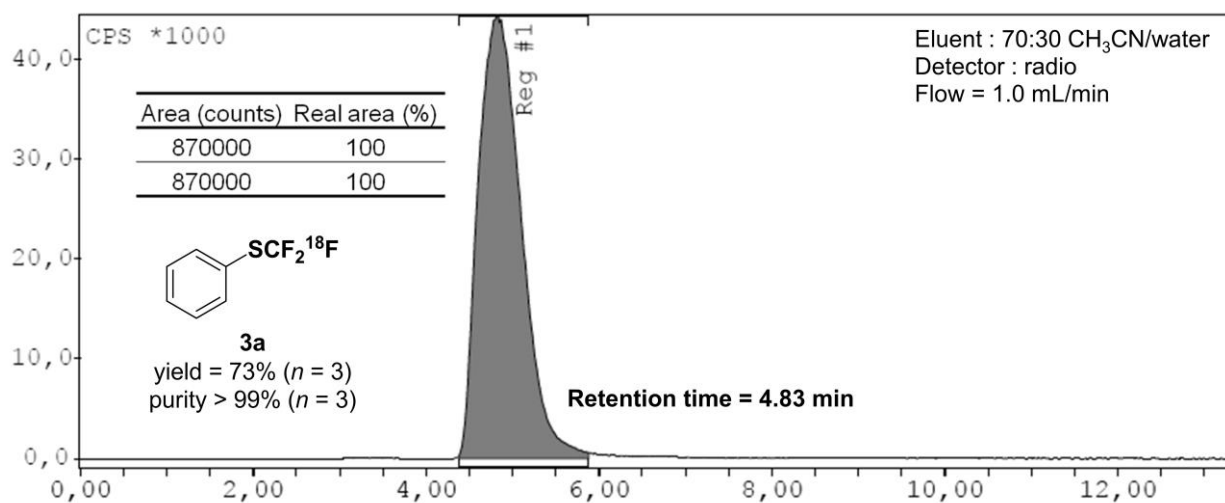

**[<sup>18</sup>F]Naphthalen-2-yl(trifluoromethyl)sulfane 3b**

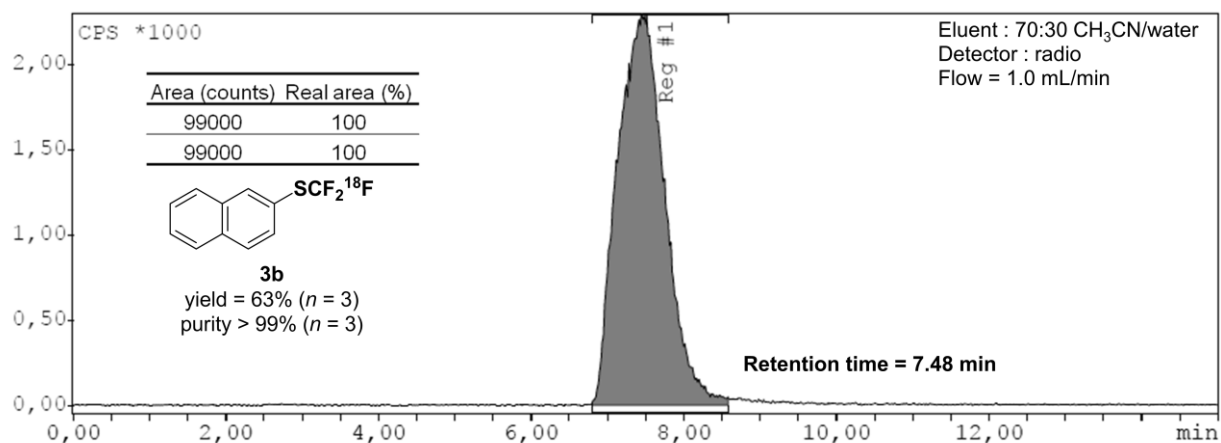

**[<sup>18</sup>F](4-Fluorophenyl)(trifluoromethyl)sulfane 3c**

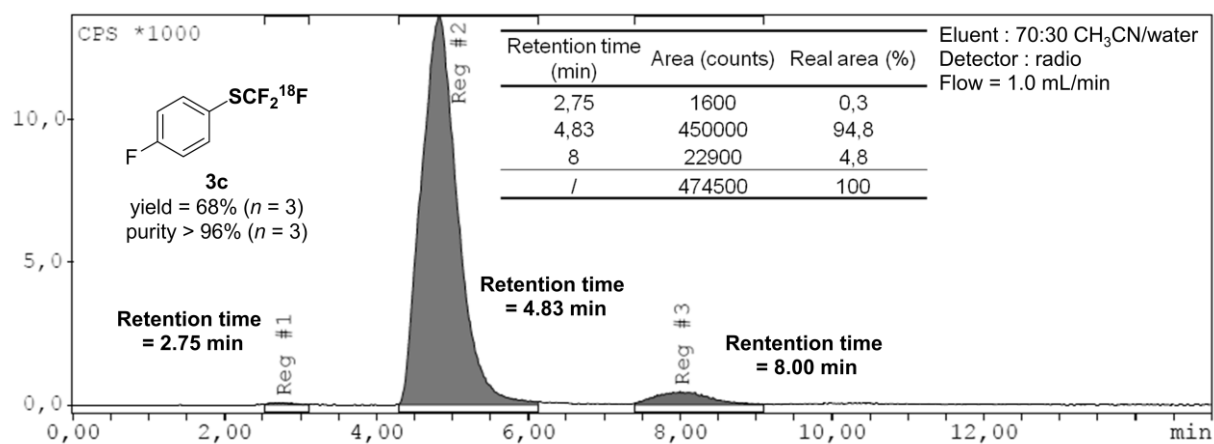

**[<sup>18</sup>F](4-Bromophenyl)(trifluoromethyl)sulfane 3d**

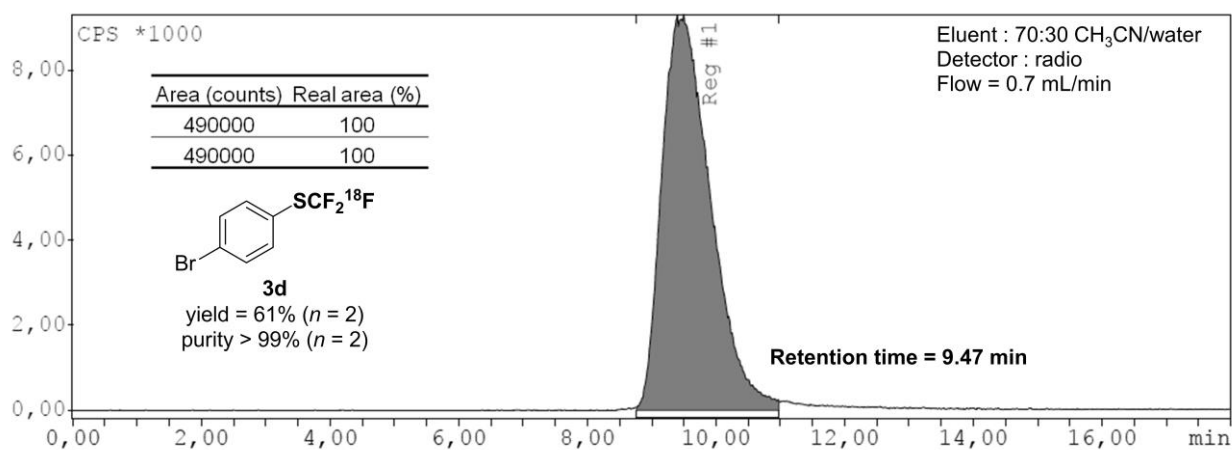

**[<sup>18</sup>F](4-chlorophenyl)(trifluoromethyl)sulfane 3e**

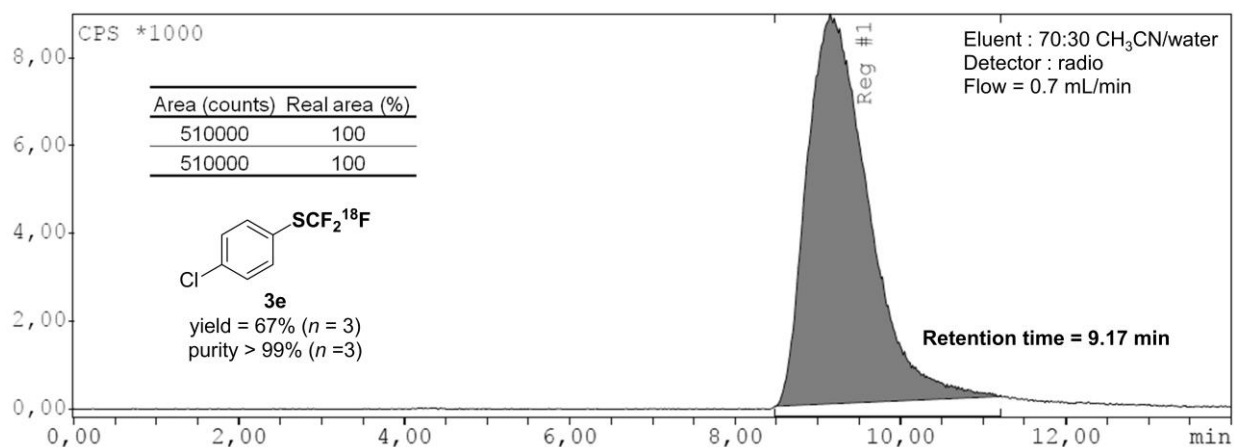

**[<sup>18</sup>F](4-Methoxyphenyl)(trifluoromethyl)sulfane 3f**

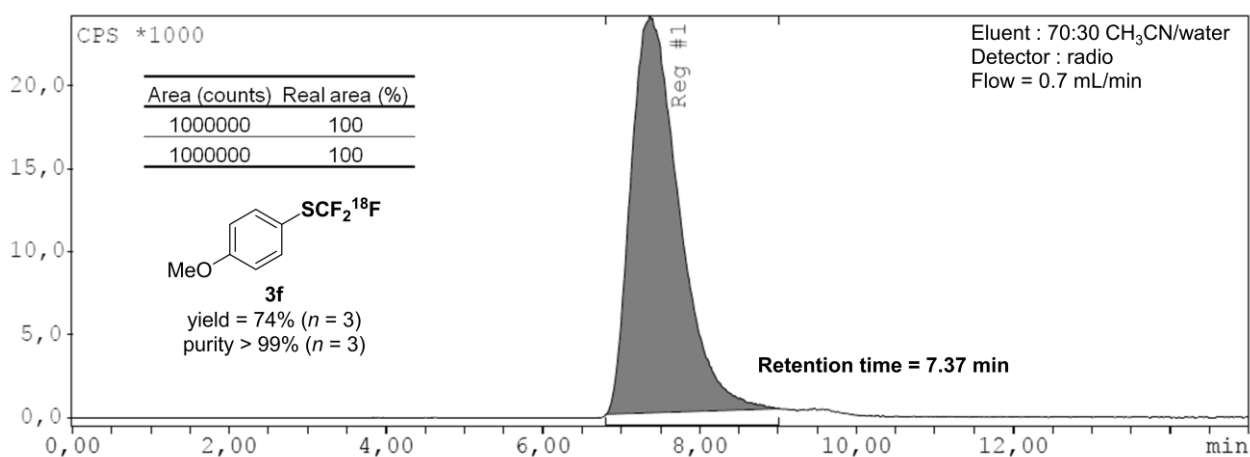

**[<sup>18</sup>F](4-(*Tert*-butyl)phenyl)(trifluoromethyl)sulfane 3g**

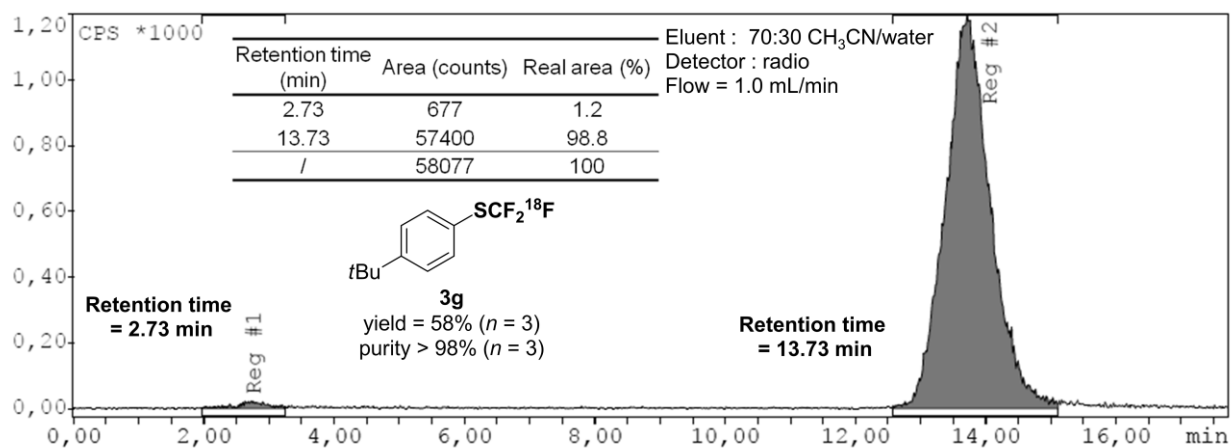

**[<sup>18</sup>F]Methyl 4-((trifluoromethyl)thio)benzoate 3h**

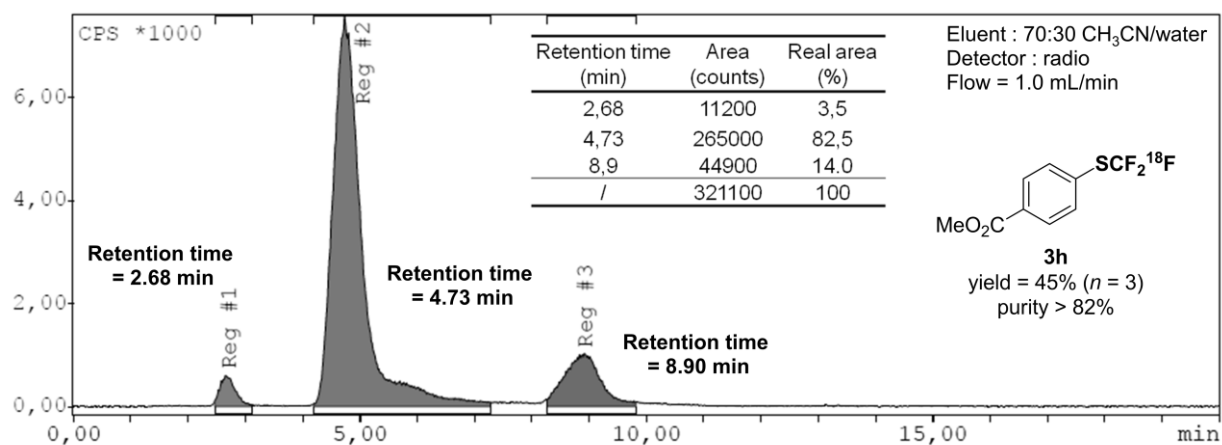

**[<sup>18</sup>F]4-((Trifluoromethyl)thio)benzonitrile 3i**

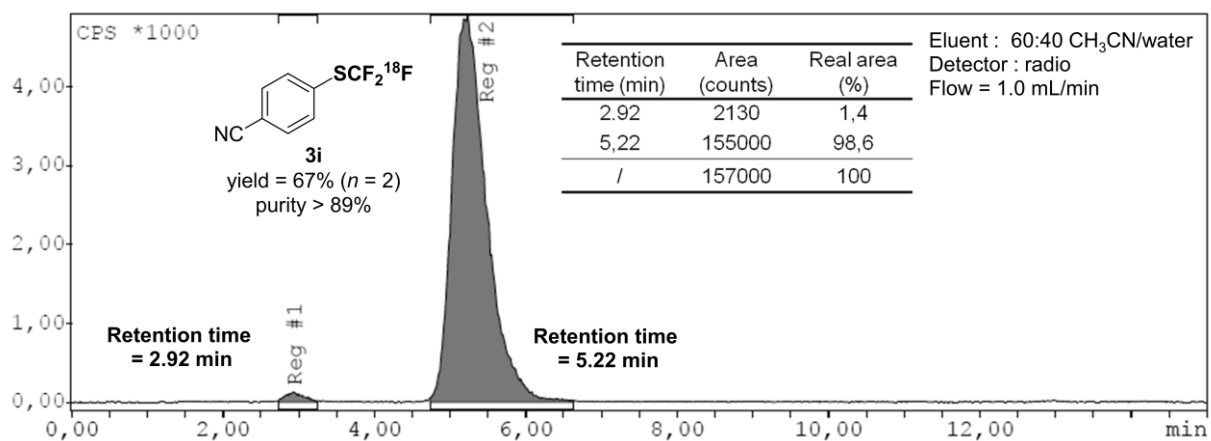

**[<sup>18</sup>F]2-((Trifluoromethyl)thio)pyridine 3j**

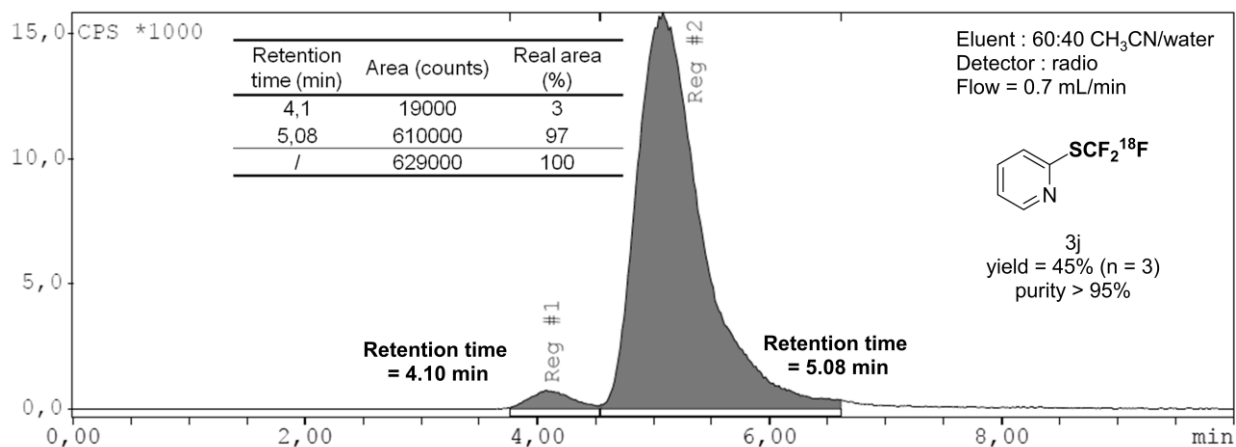



**[<sup>18</sup>F]Phenyl(trifluoromethyl)selane 3k**

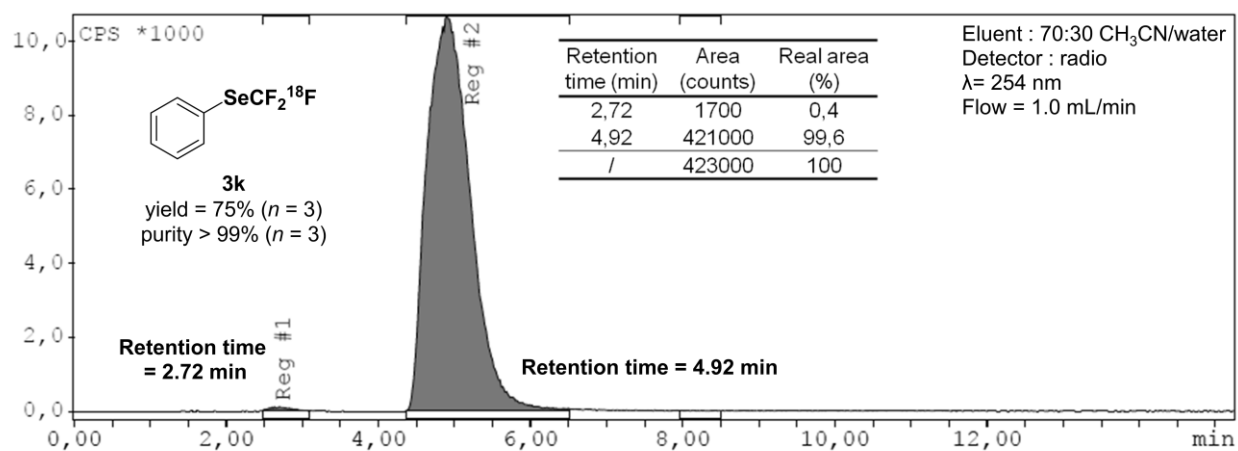

Supplement: c7cc02652h1.pdf [file c7cc02652h1.pdf]
